# Supplementary material for: Seroprevalence of anti-SARS-CoV-2 IgG among healthcare workers of a large university hospital in Milan, Lombardy, Italy: a cross-sectional study
Source: PubMed Central journal article supplement — BMJ Open. 2021 Feb 22;11(2):e047216. doi: 10.1136/bmjopen-2020-047216 (PMC7902322; doi:10.1136/bmjopen-2020-047216), 2021-02-22
Supplement: bmjopen-2020-047216.draft_revisions.pdf [file bmjopen-2020-047216.draft_revisions.pdf]

# BMJ Open

BMJ Open is committed to open peer review. As part of this commitment we make the peer review history of every article we publish publicly available.

When an article is published we post the peer reviewers' comments and the authors' responses online. We also post the versions of the paper that were used during peer review. These are the versions that the peer review comments apply to.

The versions of the paper that follow are the versions that were submitted during the peer review process. They are not the versions of record or the final published versions. They should not be cited or distributed as the published version of this manuscript.

BMJ Open is an open access journal and the full, final, typeset and author-corrected version of record of the manuscript is available on our site with no access controls, subscription charges or pay-per-view fees (<http://bmjopen.bmj.com>).

If you have any questions on BMJ Open's open peer review process please email [info.bmjopen@bmj.com](mailto:info.bmjopen@bmj.com)

# BMJ Open

## Seroprevalence of anti-SARS-CoV-2 IgG among health-care workers is not impacted by frontline activity and mirrors the values of general population

|                               |                                                                                                                                                                                                                                                                                                                                                                                                                                                                                                                                                                                                                                                                                                                                                                                                                                                                                                                                                                                                                                                                                                                                                                                                                                                                                                                                                                                                                                                                                                                                                                              |
|-------------------------------|------------------------------------------------------------------------------------------------------------------------------------------------------------------------------------------------------------------------------------------------------------------------------------------------------------------------------------------------------------------------------------------------------------------------------------------------------------------------------------------------------------------------------------------------------------------------------------------------------------------------------------------------------------------------------------------------------------------------------------------------------------------------------------------------------------------------------------------------------------------------------------------------------------------------------------------------------------------------------------------------------------------------------------------------------------------------------------------------------------------------------------------------------------------------------------------------------------------------------------------------------------------------------------------------------------------------------------------------------------------------------------------------------------------------------------------------------------------------------------------------------------------------------------------------------------------------------|
| Journal:                      | <i>BMJ Open</i>                                                                                                                                                                                                                                                                                                                                                                                                                                                                                                                                                                                                                                                                                                                                                                                                                                                                                                                                                                                                                                                                                                                                                                                                                                                                                                                                                                                                                                                                                                                                                              |
| Manuscript ID                 | bmjopen-2020-047216                                                                                                                                                                                                                                                                                                                                                                                                                                                                                                                                                                                                                                                                                                                                                                                                                                                                                                                                                                                                                                                                                                                                                                                                                                                                                                                                                                                                                                                                                                                                                          |
| Article Type:                 | Original research                                                                                                                                                                                                                                                                                                                                                                                                                                                                                                                                                                                                                                                                                                                                                                                                                                                                                                                                                                                                                                                                                                                                                                                                                                                                                                                                                                                                                                                                                                                                                            |
| Date Submitted by the Author: | 21-Nov-2020                                                                                                                                                                                                                                                                                                                                                                                                                                                                                                                                                                                                                                                                                                                                                                                                                                                                                                                                                                                                                                                                                                                                                                                                                                                                                                                                                                                                                                                                                                                                                                  |
| Complete List of Authors:     | Lombardi, Andrea; Fondazione IRCCS Ca' Granda Ospedale Maggiore Policlinico, Infectious Diseases<br>Mangioni, Davide; Fondazione IRCCS Ca' Granda Ospedale Maggiore Policlinico, Infectious Diseases<br>Consonni, Dario; Fondazione IRCCS Ca' Granda – Ospedale Maggiore Policlinico, Epidemiology Unit<br>Cariani, Lisa; Fondazione IRCCS Ca' Granda Ospedale Maggiore Policlinico, Clinical Laboratory<br>Bono, Patrizia; Fondazione IRCCS Ca' Granda Ospedale Maggiore Policlinico, Clinical Laboratory<br>Cantù, Anna; Fondazione IRCCS Ca' Granda Ospedale Maggiore Policlinico, Medical Direction<br>Tiso, Basilio; Fondazione IRCCS Ca' Granda Ospedale Maggiore Policlinico, Medical Direction<br>Carugno, Michele; Università degli Studi di Milano, Department of Clinical Sciences and Community Health<br>Muscatello, Antonio; Fondazione IRCCS Ca' Granda Ospedale Maggiore Policlinico, Infectious Diseases<br>Lunghi, Giovanna; Fondazione IRCCS Ca' Granda Ospedale Maggiore Policlinico, Infectious Diseases<br>Pesatori, Angela; University of Milan, Italy, Occupational and Environmental Health<br>Riboldi, Luciano; Fondazione IRCCS Ca' Granda – Ospedale Maggiore Policlinico, Department of Preventive Medicine, Unit of Epidemiology<br>Ceriotti, Ferruccio; Fondazione IRCCS Ca' Granda Ospedale Maggiore Policlinico, Clinical Laboratory<br>Bandera, Alessandra; Fondazione IRCCS Ca' Granda Ospedale Maggiore Policlinico, Infectious Diseases<br>Gori, Andrea; Fondazione IRCCS Ca' Granda Ospedale Maggiore Policlinico, Infectious Diseases |
| Keywords:                     | OCCUPATIONAL & INDUSTRIAL MEDICINE, VIROLOGY, Diagnostic microbiology < INFECTIOUS DISEASES, Public health < INFECTIOUS DISEASES                                                                                                                                                                                                                                                                                                                                                                                                                                                                                                                                                                                                                                                                                                                                                                                                                                                                                                                                                                                                                                                                                                                                                                                                                                                                                                                                                                                                                                             |
|                               |                                                                                                                                                                                                                                                                                                                                                                                                                                                                                                                                                                                                                                                                                                                                                                                                                                                                                                                                                                                                                                                                                                                                                                                                                                                                                                                                                                                                                                                                                                                                                                              |

1  
2  
3  
4  
5  
6  
7  
8  
9  
10  
11  
12  
13  
14  
15  
16  
17  
18  
19  
20  
21  
22  
23  
24  
25  
26  
27  
28  
29  
30  
31  
32  
33  
34  
35  
36  
37  
38  
39  
40  
41  
42  
43  
44  
45  
46  
47  
48  
49  
50  
51  
52  
53  
54  
55  
56  
57  
58  
59  
60

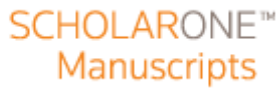

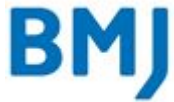

I, the Submitting Author has the right to grant and does grant on behalf of all authors of the Work (as defined in the below author licence), an exclusive licence and/or a non-exclusive licence for contributions from authors who are: i) UK Crown employees; ii) where BMJ has agreed a CC-BY licence shall apply, and/or iii) in accordance with the terms applicable for US Federal Government officers or employees acting as part of their official duties; on a worldwide, perpetual, irrevocable, royalty-free basis to BMJ Publishing Group Ltd ("BMJ") its licensees and where the relevant Journal is co-owned by BMJ to the co-owners of the Journal, to publish the Work in this journal and any other BMJ products and to exploit all rights, as set out in our [licence](#).

The Submitting Author accepts and understands that any supply made under these terms is made by BMJ to the Submitting Author unless you are acting as an employee on behalf of your employer or a postgraduate student of an affiliated institution which is paying any applicable article publishing charge ("APC") for Open Access articles. Where the Submitting Author wishes to make the Work available on an Open Access basis (and intends to pay the relevant APC), the terms of reuse of such Open Access shall be governed by a Creative Commons licence – details of these licences and which [Creative Commons](#) licence will apply to this Work are set out in our licence referred to above.

Other than as permitted in any relevant BMJ Author's Self Archiving Policies, I confirm this Work has not been accepted for publication elsewhere, is not being considered for publication elsewhere and does not duplicate material already published. I confirm all authors consent to publication of this Work and authorise the granting of this licence.

1  
2  
3 1 **Seroprevalence of anti-SARS-CoV-2 IgG among health-care workers is not impacted by**  
4  
5 2 **frontline activity and mirrors the values of general population**  
6  
7

8 3 Andrea Lombardi<sup>1\*</sup>, Davide Mangioni<sup>1\*</sup>, Dario Consonni<sup>2</sup>, Lisa Cariani<sup>3</sup>, Patrizia Bono<sup>3</sup>,  
9 4 Anna Paola Cantù<sup>4</sup>, Basilio Tiso<sup>4</sup>, Michele Carugno<sup>2,5</sup>, Antonio Muscatello<sup>1</sup>, Giovanna  
10 5 Lunghi<sup>3</sup>, Angela Cecilia Pesatori<sup>2,5</sup>, Luciano Riboldi<sup>6</sup>, Ferruccio Ceriotti<sup>3</sup>, Alessandra  
11 6 Bandera<sup>1,7,8</sup>, Andrea Gori<sup>1,7</sup>

12  
13 7 *<sup>1</sup>Infectious Diseases Unit, Foundation IRCCS Ca' Granda Ospedale Maggiore Policlinico,*  
14 8 *Milan, Italy; <sup>2</sup>Epidemiology Unit, Foundation IRCCS Ca' Granda Ospedale Maggiore*  
15 9 *Policlinico, Milan, Italy; <sup>3</sup>Clinical Laboratory, Foundation IRCCS Ca' Granda Ospedale*  
16 10 *Maggiore, Milan, Italy; <sup>4</sup>Medical Direction, Foundation IRCCS Ca' Granda Ospedale*  
17 11 *Maggiore Policlinico, Milan, Italy; <sup>5</sup>Department of Clinical Sciences and Community Health,*  
18 12 *University of Milano, Milan, Italy; <sup>6</sup>Occupational Health Unit, Foundation IRCCS Ca'*  
19 13 *Granda Ospedale Maggiore Policlinico, Milan, Italy; <sup>7</sup>Centre for Multidisciplinary Research*  
20 14 *in Health Science (MACH), University of Milan, Milan, Italy; <sup>8</sup> Department of*  
21 15 *Pathophysiology and Transplantation, University of Milan, Milan, Italy.*

22  
23  
24  
25  
26  
27  
28  
29  
30  
31  
32  
33  
34  
35  
36  
37  
38  
39  
40 16 \*Shared first authorship.

41  
42  
43 17 **Corresponding author:** Andrea Lombardi, MD, Infectious Diseases Unit, Foundation  
44 18 IRCCS Ca' Granda Ospedale Maggiore Policlinico Via Francesco Sforza 35, 20122 Milan,  
45 19 Italy. E-mail: [andrea.lombardi@policlinico.mi.it](mailto:andrea.lombardi@policlinico.mi.it) Tel: +390255034767

46  
47  
48  
49  
50 20 **Abstract electronic words count:** 281

51  
52  
53 21 **Main text electronic words count:** 3157  
54  
55  
56  
57  
58  
59  
60

## 23 Abstract

24 **Objectives** To assess the seroprevalence of anti-SARS-CoV-2 IgG among HCWs in our  
25 University Hospital and verify the risk of acquiring the infection according to work area.

26 **Design** Cross-sectional observational study

27 **Setting** Monocentric, Italian third-level university hospital

28 **Participants** All the employees of the hospital on a voluntary base for a total of 4,055  
29 individuals.

30 **Primary and secondary outcome measures** Number of anti-SARS-CoV-2 positive serology  
31 according to working area. Association of anti-SARS-CoV-2 positive serology according to  
32 selected variables (age, gender, country of origin, BMI, smoking, symptoms, contact with  
33 confirmed cases).

34 **Results** From April 27 to June 12, 2020, 4,055 HCWs were tested and 309 (7.6%) had a  
35 serologic positive test. No relevant difference was found between men and women (8.3% vs  
36 7.3%), whereas a higher prevalence was observed among foreign-born workers (27/186,  
37 14.5%), employees younger than 30 (64/668, 9.6%) or older than 60 years (38/383, 9.9%)  
38 and among healthcare assistants (40/320, 12.5%). Working as frontline HCWs was not  
39 associated with an increased frequency of positive serology ( $p=0.42$ ). A positive association  
40 was found with presence and number of symptoms ( $p<0.001$ ). The symptoms most frequently  
41 associated with a positive serology were taste and smell alterations (OR 4.62, 95% CI 2.99-  
42 7.15) and fever (OR 4.37, 95%CI 3.11-6.13). No symptoms were reported in 84/309 (27.2%)  
43 HCWs with positive IgG levels. Declared exposure to a suspected/confirmed case was more  
44 frequently associated with positive serology when the contact was a family member (19/94,  
45 20.2%) than a patient or colleague (78/888, 8.8%).

1  
2  
3 46 **Conclusions** SARS-CoV-2 infection occurred undetected in a large fraction of HCWs and it  
4  
5 47 was not associated with working in COVID-19 frontline areas. Beyond the hospital setting,  
6  
7 48 exposure within the community represents an additional source of infection for HCWs.  
8  
9  
10  
11 49

12  
13  
14 50 **Strengths and limitations of this study**

- 15  
16  
17 51 • We assessed the prevalence of SARS-CoV-2 antibodies among healthcare workers,  
18  
19 52 strengthening the fact that working in COVID-19 frontline areas is not associated with  
20  
21 53 an increased risk of being infected which is more related to exposure within the  
22  
23 54 community.  
24  
25  
26 55 • We performed our study on a large cohort of healthcare workers, from an area with a  
27  
28 56 high incidence of COVID-19.  
29  
30  
31  
32 57 • Our study was monocentric and performed in Italy, therefore the results may be  
33  
34 58 applicable only to similar scenario (e.g. Western countries with public health system).  
35  
36  
37 59

40 60 **Keywords:** occupational exposure; screening; nosocomial transmission; SARS-COV-2;  
41  
42 61 COVID-19.  
43  
44  
45 62

46  
47  
48 63 **Funding:** none related to the content of this manuscript.  
49  
50

51 64 **Conflict of interests:** none related to the content of this manuscript.  
52  
53  
54  
55  
56  
57  
58  
59  
60

## 66 **Introduction**

67 As of October 2020, the ongoing pandemic of coronavirus disease 2019 (COVID-19) caused  
68 by the severe acute respiratory syndrome coronavirus 2 (SARS-CoV-2) has affected more  
69 than 30 million people worldwide resulting in more than 1 million deaths [1]. Since the  
70 beginning of the pandemic, healthcare workers (HCWs) has been identified as a group at high  
71 risk of infection [2]. The occurrence of nosocomial transmission of SARS-CoV-2 has been  
72 well described, emphasizing the adherence to infection control measures among HCWs to  
73 protect themselves and avoid nosocomial outbreaks [2–5]. Conversely, other studies did not  
74 find differences in SARS-CoV-2 infection rates between frontline and non-frontline HCWs  
75 and between HCWs and the general population, suggesting community over nosocomial  
76 acquisition as major source of infection [6–8].

77 In the current pandemic scenario, the optimal method to screen HCWs is still under debate.  
78 At present, the most frequently employed testing strategy is the detection of SARS-CoV-2  
79 RNA through reverse transcriptase–polymerase chain reaction (RT-PCR) on upper  
80 respiratory specimens in symptomatic individuals or in those exposed to confirmed cases of  
81 COVID-19. Unfortunately, the testing strategy based solely on upper respiratory specimens  
82 has significant limitations. In a large metanalysis, the rate of positive nasopharyngeal swabs  
83 (NPS) ranged from 25% to 80% and decreased with time and in asymptomatic or pauci-  
84 symptomatic cases [9]. Of note, no data on test sensitivity in asymptomatic infected  
85 individuals exists, and clinical symptoms of COVID-19 among infected HCWs are often  
86 relatively mild, with fever and dyspnoea reported in 38-60% and 13-47% of cases,  
87 respectively [2,3,7,8,10]. It is also not uncommon for HCWs to work with mild symptoms  
88 [8,11], which increases the hazard of nosocomial outbreaks.



1  
2  
3 89 More recently, the serologic assessment of SARS-CoV-2 infection has been proposed as  
4  
5 90 screening strategy among both HCWs and the general population. Antibody sensitivity is  
6  
7  
8 91 30% one week after symptoms onset and rises to 70% and >90% at 2 and 3 weeks,  
9  
10 92 respectively [12]. Hence, the most useful role for serology consists in detecting previous  
11  
12 93 SARS-CoV-2 infection as screening strategy in exposed or high-risk HCWs.

14  
15 94 Here we present the results of SARS-CoV-2 serology assessment performed on HCWs from  
16  
17 95 April 27, 2020 to June 12, 2020 at the Fondazione IRCCS Ca' Granda Ospedale Maggiore  
18  
19 96 Policlinico located in Milan, Lombardy, by far the Italian region mostly affected by COVID-  
20  
21 97 19. To cope with the COVID-19 emergency, the organization of our Hospital has been  
22  
23 98 modified, and different wards have been entirely dedicated to the management of COVID-19  
24  
25 99 patients to accommodate 350 of them [13]. We evaluated the association between positive  
26  
27 100 tests and demographic characteristics, occupation and working environment (frontline vs non-  
28  
29 101 frontline HCWs). In addition, we assessed the frequency of positive tests in HCWs with  
30  
31 102 previous symptoms of COVID-19 or who had been quarantined or in contact with suspected  
32  
33 103 or proven COVID-19 cases.

## 34 104 **Methods**

35  
36  
37  
38  
39 105 We collected occupational and clinical characteristics of all the consecutive HCWs who  
40  
41 106 performed a serologic assay for SARS-CoV-2 at the Fondazione IRCCS Ca' Granda  
42  
43 107 Ospedale Maggiore Policlinico in Milan, Italy from April 27 to June 12, 2020. Policlinico  
44  
45 108 Hospital is one of the leading Italian hospitals in clinical and research activities located in  
46  
47 109 Milan, northern Italy, with more than 4,750 HCWs, 900 beds and 36,000 hospitalization per  
48  
49 110 year. From 21 February 2020, to cope with the COVID-19 emergency, the hospital  
50  
51 111 organization was quickly modified with the installation of four different pavilions entirely  
52  
53 112 dedicated to the management of COVID-19 patients to accommodate 350 patients, of which  
54  
55  
56  
57  
58  
59  
60

1  
2  
3 113 50 in intensive care units (13). Specific clinical pathways for COVID-19 patients were  
4  
5 114 created for critical settings (*i.e.*, triage and emergency ward, operating rooms, radiology  
6  
7 115 department) and several internal guidelines were implemented and periodically updated.  
8  
9 116 Trainings on donning and doffing of personal protective equipment (PPE) were provided by  
10  
11 117 the infectious disease specialists and anaesthesiologists to the HCWs working in COVID-19  
12  
13 118 areas. Trainings were targeted to physicians, nurses and health assistants and consisted in  
14  
15 119 brief reviews on COVID-19 clinical and epidemiological issues, set-up of COVID-19 wards  
16  
17 120 in contaminated, buffer and clean areas, guidance on proper use of PPE in patient daily care  
18  
19 121 and in specific situations (*i.e.*, patient transportation, dialysis, surgical interventions including  
20  
21 122 childbirth).

22  
23  
24  
25  
26 123 The serologic assay was offered freely to all hospital HCWs. At blood drawing, HCWs were  
27  
28 124 asked to complete a questionnaire containing demographics, occupational and clinical  
29  
30 125 characteristics. Information on age, gender, nationality, body mass index (BMI), smoking and  
31  
32 126 comorbidities (hypertension, diabetes, immunosuppressive therapies, cardiac, respiratory or  
33  
34 127 renal chronic diseases) was registered. HCWs were stratified by working environment in  
35  
36 128 frontline and non-frontline workers (whether they provided direct assistance to COVID-19  
37  
38 129 patients or not) and by job title in physicians (including residents), nurses and midwives,  
39  
40 130 healthcare assistants, health technicians, and clerical workers and technicians. The presence  
41  
42 131 of any of the following symptoms since the end of February 2020 was collected: fever,  
43  
44 132 cough, dyspnoea, diarrhoea, nausea or vomit, ageusia/dysgeusia or anosmia/parosmia,  
45  
46 133 rhinorrhoea, ocular symptoms, sore throat, headache, myalgia, asthenia. The presence of any  
47  
48 134 of the following risk factors for previous exposure to SARS-CoV-2 was investigated:  
49  
50 135 performance of NPS (date and results), prophylaxis for SARS-CoV-2 infection (day and type  
51  
52 136 of medication), home quarantine (period), contact with suspected or proven COVID-19 cases  
53  
54 137 (date and type of exposure).  
55  
56  
57  
58  
59  
60

1  
2  
3 138 The study was approved by the institutional review board (368\_2020bis) of our hospital and  
4  
5 139 was conducted in accordance with the Helsinki Declaration.  
6  
7

8 140 *SARS-CoV-2 serology*  
9

10  
11 141 SARS-CoV-2 serology was performed with LIAISON® SARS-CoV-2 S1/S2 IgG test on  
12  
13 142 LIAISON® XL (DiaSorin, Saluggia, Italy). The test is a chemiluminescent immunoassay  
14  
15 143 (CLIA) that detects quantitative anti-S1 and anti-S2 specific IgG antibodies against SARS-  
16  
17 144 CoV-2 in human serum. The test has, after >15 days from the infection, a declared sensitivity  
18  
19 145 of 97.4% and a specificity of 98.5%. A test was considered positive when the value observed  
20  
21 146 was equal to or above 15 AU/mL [14].  
22  
23  
24  
25

26 147 *Statistical analysis*  
27

28  
29 148 We calculated the adjusted seroprevalence using the formula: adjusted prevalence =  
30  
31 149 (observed prevalence + specificity – 1)/(sensitivity + specificity – 1) [15], where sensitivity  
32  
33 150 and specificity were those declared by the manufacturer.  
34  
35

36 151 We compared the prevalence of positive tests according to selected variables using chi-  
37  
38 152 squared tests. We then calculated odds ratios (OR) and 95% confidence intervals (CI) by  
39  
40 153 fitting a multivariable logistic regression model containing the following covariates: country  
41  
42 154 of origin, gender, age class, occupation, frontline work, BMI class, and cigarette smoking.  
43  
44 155 For other variables (quarantine, symptoms, contact with COVID-19 case,  
45  
46 156 prophylaxis/therapy, and NPS), we used univariate logistic models. We evaluated the  
47  
48 157 discriminating ability of the number of reported symptoms in a multivariable logistic  
49  
50 158 regression model containing all groups of symptoms. Area under the ROC curve (AUC) was  
51  
52 159 calculated after these models. To verify possible changes in IgG positivity over time, among  
53  
54 160 HCWs with a previous positive nasopharyngeal swab (NPS), we analysed the percentage of  
55  
56  
57  
58  
59  
60

1  
2  
3 161 subjects with elevated IgG levels according to the days elapsed since the first positive NPs  
4  
5 162 using logistic regression. Statistical analysis was performed with Stata 16 (StataCorp. 2019).  
6  
7

### 8 163 *Patient and Public Involvement*

10  
11 164 The serologic assessment was freely offered to all the healthcare workers of our hospital. The  
12  
13 165 majority of them (4,055/4,572, 88.7%) participated and autonomously completed a  
14  
15 166 questionnaire.  
16  
17

### 18 167 **Results**

19  
20  
21 168 From April 27 to June 12, 2020, 4,055 HCWs with a mean age of 44.8 years, 2,823 women  
22  
23 169 (69.6%) and 1,232 men (30.4%), provided a blood sample and completed the questionnaire.  
24  
25 170 The majority were physicians/residents (1,292/4,055, 31.9%) and nurses/midwives  
26  
27 171 (1,230/4,055, 30.3%). The overall frequency of workers with a positive test was 309/4,055  
28  
29 172 (7.6%; 95% CI: 6.8-8.5%) (Table 1). The prevalence adjusted for declared test sensitivity and  
30  
31 173 specificity would be 6.4%. The frequency of positive tests was almost double among workers  
32  
33 174 from abroad (14.5%) compared to those of Italian ancestry (7.3%), whereas women and men  
34  
35 175 had a similar prevalence. The highest frequencies of a positive test were observed in the  
36  
37 176 lowest (<30 years) and highest ( $\geq 60$  years) age classes. Across HCWs' job titles, a significant  
38  
39 177 higher prevalence was detected among healthcare assistants (40/320, 12.5%), while weak  
40  
41 178 differences were found for the other occupations (6.0% to 8.0%). No difference was observed  
42  
43 179 between frontline and non-frontline HCWs (7.2% vs 7.9%). There was a positive trend of test  
44  
45 180 positivity according to BMI, while current smokers had less than half the prevalence of test  
46  
47 181 positivity than former and never smokers (4.0%, 8.9% and 8.5%, respectively). No  
48  
49 182 association was found between test results and comorbidities (hypertension, diabetes, cardiac,  
50  
51 183 respiratory, or renal chronic diseases) or being on immunosuppressive treatment (data not  
52  
53 184 shown). All findings of the univariate analyses were confirmed in the multivariable analysis.  
54  
55  
56  
57  
58  
59  
60

**Table 1.** Association between selected variables and prevalence of positive tests (anti-SARS-CoV-2 IgG $\geq$ 15 AU/mL) among healthcare workers in a large University hospital, Milan, Italy, April 27 to June 12, 2020.

| Variable                        | Workers | Positive test |      |          |      |           |
|---------------------------------|---------|---------------|------|----------|------|-----------|
|                                 | N       | N             | %    | p-value* | OR** | 95% CI**  |
| All                             | 4,055   | 309           | 7.6  |          |      |           |
| Country of origin               |         |               |      |          |      |           |
| Italy                           | 3,869   | 282           | 7.3  | <0.001   | 1.00 | Reference |
| Other                           | 186     | 27            | 14.5 |          | 1.82 | 1.07-3.06 |
| Gender                          |         |               |      |          |      |           |
| Women                           | 2,823   | 207           | 7.3  | 0.30     | 1.00 | Reference |
| Men                             | 1,232   | 102           | 8.3  |          | 1.13 | 0.85-1.52 |
| Age (years)                     |         |               |      |          |      |           |
| <30                             | 668     | 64            | 9.6  | 0.02     | 1.00 | Reference |
| 30-39                           | 1,018   | 78            | 7.7  |          | 0.74 | 0.51-1.07 |
| 40-49                           | 858     | 48            | 5.6  |          | 0.46 | 0.30-0.72 |
| 50-59                           | 1,128   | 81            | 7.2  |          | 0.64 | 0.43-0.95 |
| 60+                             | 383     | 38            | 9.9  |          | 0.83 | 0.50-1.36 |
| Occupation                      |         |               |      |          |      |           |
| Physicians, including residents | 1,292   | 93            | 7.2  | 0.006    | 0.99 | 0.64-1.53 |
| Nurses, midwives                | 1,230   | 99            | 8.0  |          | 1.31 | 0.85-2.04 |
| Healthcare assistants           | 320     | 40            | 12.5 |          | 1.84 | 1.04-3.25 |
| Health technicians***           | 585     | 35            | 6.0  |          | 0.84 | 0.50-1.40 |
| Clerical workers, technicians   | 628     | 42            | 6.7  |          | 1.00 | Reference |
| Frontline HCWs                  |         |               |      |          |      |           |
| Never                           | 2,061   | 149           | 7.2  | 0.42     | 1.00 | Reference |
| Ever                            | 1,730   | 137           | 7.9  |          | 0.92 | 0.69-1.24 |
| Missing                         | 264     | 23            | 8.7  |          |      |           |
| BMI                             |         |               |      |          |      |           |
| <20                             | 684     | 46            | 6.7  | 0.04     | 0.90 | 0.62-1.32 |
| 20-24.99                        | 2,035   | 145           | 7.1  |          | 1.00 | Reference |
| 25-29.99                        | 945     | 79            | 8.4  |          | 1.10 | 0.80-1.52 |
| 30+                             | 314     | 31            | 9.9  |          | 1.52 | 0.98-2.35 |
| Missing                         | 77      | 8             | 10.4 |          |      |           |
| Cigarette smoking               |         |               |      |          |      |           |
| Never                           | 2,493   | 210           | 8.4  | <0.001   | 1.00 | Reference |
| Former                          | 552     | 49            | 8.9  |          | 1.12 | 0.79-1.58 |
| Current                         | 842     | 34            | 4.0  |          | 0.41 | 0.27-0.61 |
| Missing                         | 168     | 16            | 9.5  |          |      |           |

Abbreviations: BMI, body mass index; CI, confidence interval; OR, odds ratio.

\*From chi-squared test. For BMI: from chi-squared test for trend. Missing data not included in analyses.

191 \*\*From a multivariable logistic regression model including country of origin, gender, age,  
192 occupation, frontline area, BMI, and smoking. Missing data not included in analyses.  
193 \*\*\*Includes biologists, radiology and laboratory technicians, psychologists, other health  
194 technicians  
195

196 Serology results stratified according to risk factors for previous exposure to SARS-CoV-2 are  
197 reported in Table 2. A significant higher seropositivity was found among HCWs who had  
198 been quarantined (166/426=39.0%, OR=15.6 95% CI: 12.0-20.1), who had taken antiviral  
199 drugs as treatment or prophylaxis (44/135=32.3%, OR=6.59, 95%CI: 4.51-9.65) and who had  
200 reported any symptom of SARS-Cov-2 infection in the preceding four weeks  
201 (225/1,511=14.9%, OR=5.12, 95%CI: 3.95-6.64). We observed a clear monotonic increasing  
202 trend in test positivity with number of symptoms, from 56/608 (9.2%) among HCWs with  
203 just one symptom to 62/170 (36.5%) in those with five or more. Conversely, no symptom was  
204 reported in 84/309 HCWs with positive serological test (27.2%). The prevalence of positive  
205 tests was 5.6% (134/2,372) in HCWs who did not report contacts with a person with COVID-  
206 19 and 10.1% (154/1,525) in those who reported contacts with suspected or confirmed cases.  
207 Of note, prevalence of IgG positivity more than doubled if the reported contact was a family  
208 member (19/94=20.2%) compared to a patient or a colleague (78/888=8.8%). HCWs who had  
209 undergone SARS-CoV-2 NPS with negative result had a frequency of positive serology of  
210 7.4% (175/2,375), almost the same as the overall hospital seroprevalence. On the contrary,  
211 the percentage of IgG positivity was much higher (74.7%, 130/174) in those who had a  
212 positive NPS. In 162 subjects NPS had been performed before serology, while in 12 HCWs  
213 NPS was performed because of a positive serology. Only four workers among the 1,506 who  
214 had never performed NPS (0.3%) had elevated IgG levels.

215 **Table 2.** Association between quarantine, symptoms contact with COVID-19 patients, and  
216 prophylaxis and prevalence of positive tests (anti-SARS-CoV-2 IgG $\geq$ 15 AU/mL) among  
217 healthcare workers in a large University hospital, Milan Italy, April 27 to June 12, 2020.

| Variable                                   | Workers | Positive test |      |          |      |           |
|--------------------------------------------|---------|---------------|------|----------|------|-----------|
|                                            | N       | N             | %    | p-value* | OR** | 95% CI**  |
| Quarantine                                 |         |               |      |          |      |           |
| No                                         | 3,629   | 143           | 3.9  | <0.001   | 1.00 | Reference |
| Yes                                        | 426     | 166           | 39.0 |          | 15.6 | 12.0-20.1 |
| Any symptom                                |         |               |      |          |      |           |
| No                                         | 2,544   | 84            | 3.3  | <0.001   | 1.00 | Reference |
| Yes                                        | 1,511   | 225           | 14.9 |          | 5.12 | 3.95-6.64 |
| Number of symptoms                         |         |               |      |          |      |           |
| 1                                          | 608     | 56            | 9.2  | <0.001   | 2.97 | 2.09-4.22 |
| 2                                          | 389     | 45            | 11.6 |          | 3.83 | 2.62-5.60 |
| 3                                          | 226     | 38            | 16.8 |          | 5.91 | 3.93-8.93 |
| 4                                          | 1,118   | 24            | 20.3 |          | 7.48 | 4.54-12.3 |
| 5-10                                       | 170     | 62            | 36.5 |          | 16.8 | 11.5-24.6 |
| Contact with COVID-19 case                 |         |               |      |          |      |           |
| Unknown                                    | 2,372   | 134           | 5.6  | <0.001   | 1.00 | Reference |
| Suspected case                             | 335     | 34            | 10.1 |          | 1.89 | 1.27-2.80 |
| Confirmed case                             | 1,190   | 120           | 10.1 |          | 1.87 | 1.45-2.42 |
| Missing                                    | 158     | 21            | 13.3 |          |      |           |
| Among suspected or confirmed, contact with |         |               |      |          |      |           |
| Patients or colleagues within the hospital | 888     | 78            | 8.8  | <0.001   | 1.00 | Reference |
| Family member                              | 94      | 19            | 20.2 |          | 2.60 | 1.49-4.52 |
| Missing                                    | 543     | 57            | 10.5 |          |      |           |
| Prophylaxis or therapy                     |         |               |      |          |      |           |
| No                                         | 3,919   | 265           | 6.8  | <0.001   | 1.00 | Reference |
| Yes                                        | 136     | 44            | 32.3 |          | 6.59 | 4.51-9.65 |
| Nasopharyngeal swab                        |         |               |      |          |      |           |
| Negative*                                  | 2,376   | 175           | 7.4  | <0.001   | 1.00 | Reference |
| Positive                                   | 174     | 130           | 74.7 |          | 37.1 | 25.5-54.0 |
| Not performed                              | 1,506   | 4             | 0.3  |          | 0.03 | 0.01-0.09 |

218 Abbreviations: CI, confidence interval; OR, odds ratio.

219 \*From chi-squared test. For number of symptoms: from chi-squared test for trend. Missing  
220 data not included in analysis.

221 \*\*From univariate logistic regression models. Missing data not included in analyses.

222

223 There were 162 subjects with a positive NP swab before IgG testing. Among these, IgG  
224 testing was performed between 17 and 94 days (Figure 1, left panel), with a peak between 49  
225 and 63 days; the majority (159, 96.1%) were tested at least 21 days since the first positive  
226 swab. The percentage of positive IgG tests (N=121) increased linearly (in the logit scale) over

227 time (Figure 1, right panel); it was 50-60% between 17 and 28 days, reaching 80% only after  
 228 60 days since the first positive NP swab.

229 For every specific symptom, there was a positive association with elevated IgG levels (Table  
 230 3). Specifically, strong associations emerged with fever (19/374=31.8%) and with taste or  
 231 smell alterations (64/140=45.7%). In a multivariable model, these two symptoms were  
 232 confirmed as the strongest predictors of positive test (both ORs>4). Other symptoms  
 233 associated with positive SARS-CoV-2 serology were asthenia (OR=2.67), coryza (OR=1.90),  
 234 and cough (OR=1.65), while sore throat was negatively associated with test positivity  
 235 (OR=0.57). The AUC from the model containing all symptoms was 0.74 (95% CI: 0.74-  
 236 0.81).

237 **Table 3.** Association between selected symptoms and prevalence of positive tests (anti-  
 238 SARS-CoV-2 IgG $\geq$ 15 AU/mL) among healthcare workers in a large University hospital,  
 239 Milan, Italy, April 27 to June 12, 2020.

|                         | Workers | Positive test |      |          |      |           |
|-------------------------|---------|---------------|------|----------|------|-----------|
|                         | N       | N             | %    | p-value* | OR** | 95% CI**  |
| <b>Specific symptom</b> |         |               |      |          |      |           |
| Cough                   |         |               |      |          |      |           |
| No                      | 3,523   | 201           | 5.7  | <0.001   | 1.00 | Reference |
| Yes                     | 532     | 108           | 20.3 |          | 1.65 | 1.18-2.30 |
| Fever                   |         |               |      |          |      |           |
| No                      | 3,681   | 190           | 5.2  | <0.001   | 1.00 | Reference |
| Yes                     | 374     | 119           | 31.8 |          | 4.37 | 3.11-6.13 |
| Sore throat             |         |               |      |          |      |           |
| No                      | 3,677   | 261           | 7.1  | <0.001   | 1.00 | Reference |
| Yes                     | 378     | 48            | 12.7 |          | 0.57 | 0.38-0.86 |
| Coryza                  |         |               |      |          |      |           |
| No                      | 3,882   | 268           | 6.9  | <0.001   | 1.00 | Reference |
| Yes                     | 173     | 41            | 23.7 |          | 1.90 | 1.21-2.98 |
| Headache                |         |               |      |          |      |           |
| No                      | 3,920   | 277           | 7.1  | <0.001   | 1.00 | Reference |
| Yes                     | 135     | 32            | 23.7 |          | 0.96 | 0.58-1.61 |
| Myalgias                |         |               |      |          |      |           |
| No                      | 3,423   | 216           | 6.3  | <0.001   | 1.00 | Reference |
| Yes                     | 632     | 93            | 14.7 |          | 0.77 | 0.54-1.11 |
| Diarrhoea/nausea/vomit  |         |               |      |          |      |           |



|                             |       |     |      |        |      |           |
|-----------------------------|-------|-----|------|--------|------|-----------|
| No                          | 3,633 | 254 | 7.0  | 0.006  | 1.00 | Reference |
| Yes                         | 422   | 55  | 13.0 |        | 0.85 | 0.58-1.24 |
| Asthenia                    |       |     |      |        |      |           |
| No                          | 3,619 | 199 | 5.5  | <0.001 | 1.00 | Reference |
| Yes                         | 436   | 110 | 25.2 |        | 2.67 | 1.87-3.80 |
| Ocular symptoms             |       |     |      |        |      |           |
| No                          | 3,847 | 281 | 7.3  | 0.001  | 1.00 | Reference |
| Yes                         | 208   | 28  | 13.5 |        | 0.78 | 0.46-1.32 |
| Dyspnoea                    |       |     |      |        |      |           |
| No                          | 3,927 | 275 | 7.0  | <0.001 | 1.00 | Reference |
| Yes                         | 128   | 34  | 26.6 |        | 1.38 | 0.82-2.32 |
| Taste and smell alterations |       |     |      |        |      |           |
| No                          | 3,915 | 245 | 6.3  | <0.001 | 1.00 | Reference |
| Yes                         | 140   | 64  | 45.7 |        | 4.62 | 2.99-7.15 |

240 Abbreviations: CI, confidence interval; OR, odds ratio.

241 \*From chi-squared test.

242 \*\*From a multivariable logistic model including all symptoms.

## 243 Discussion

244 In this study of HCWs of a large University hospital located in an area deeply affected by the  
 245 COVID-19 pandemic, a relevant fraction of the personnel (7.6%) showed anti-SARS-CoV-2  
 246 IgG values compatible with a previous infection. The highest rates of seroprevalence were  
 247 detected among foreign-born workers, those belonging to extreme age groups (below 30  
 248 years and above 60 years) and healthcare assistants. SARS-CoV-2 seroprevalence of frontline  
 249 HCWs did not differ from those who did not report direct contact with COVID-19 patients.  
 250 Unsurprisingly, a large proportion (84/309, 27.2%) of workers with a positive serology did  
 251 not report any symptom in the previous four weeks. Yet, HCWs who presented symptoms  
 252 before the test, were quarantined, or took antiviral drugs as treatment or prophylaxis  
 253 displayed higher positivity rates compared to those who did not. Interestingly, smokers had a  
 254 significantly lower prevalence of positive serologies compared to non-smokers and former  
 255 smokers. Finally, among symptoms, fever and smell and taste alteration were those more  
 256 frequently associated with IgG positivity.

1  
2  
3 257 Our results are in accordance with the data presented by Sandri and colleagues, who  
4  
5 258 described a rate of positive SARS-CoV-2 serologies (in their study defined as IgG>12  
6  
7 259 AU/mL) ranging from 6.4% to 9% among the HCWs of three different hospitals in Milan  
8  
9 260 [16]. In the same study the authors described a higher seroprevalence, between 35% and  
10  
11 261 43%, in HCWs from Bergamo district, one of the areas in northern Italy most affected by  
12  
13 262 COVID-19. These results are corroborated by the data provided by the Bergamo Health  
14  
15 263 Authority, which reported a SARS-CoV-2 seroprevalence of 30.6% among HCWs from the  
16  
17 264 Bergamo metropolitan area (15). Noteworthy is thus the fact that seroprevalence among  
18  
19 265 HCWs mirrors the levels encountered in the general population, ranging from 7.1% and  
20  
21 266 56.9% in the Milan and Bergamo metropolitan area, respectively [17,18]. Wide variations in  
22  
23 267 seroprevalence among HCWs are reported worldwide, reflecting the distinct epidemiologic  
24  
25 268 scenarios occurring in each Country: SARS-CoV-2 seroprevalence of 1.6%, 3.8%, 5.0%,  
26  
27 269 9.3%, 19.1%, 24.4% and 33% are reported from studies conducted among HCWs in  
28  
29 270 Germany, China, Netherlands, Spain, Sweden, United Kingdom and the USA, respectively  
30  
31 271 [6,19–24].  
32  
33  
34  
35  
36  
37

38 272 Contrasting findings exist regarding the role of direct assistance to COVID-19 patients on the  
39  
40 273 risk of SARS-CoV-2 infections in HCWs. Comparing frontline to non-frontline workers, we  
41  
42 274 observed no difference in seroprevalence rates, in line with the findings of Mani and  
43  
44 275 colleagues [7]. At the same time, we observed a significantly higher seroprevalence among  
45  
46 276 healthcare assistants (40/320, 12.5%), with all the other occupations (physician, nurses and  
47  
48 277 midwives, technicians) below 8%. A similar seroprevalence (11.8%) was observed among  
49  
50 278 healthcare assistants during the SARS pandemic in 2004 [25]. These results may suggest that,  
51  
52 279 when nosocomial transmission occurs, it mainly involves those workers who have the closest  
53  
54 280 contact with patients (e.g. healthcare assistants who take care of patients' primary needs) and  
55  
56 281 might therefore be at the highest risk. This condition may also reflect on the higher  
57  
58  
59  
60

1  
2  
3 282 seroprevalence detected among HCWs from abroad. Indeed, a large fraction of this group is  
4  
5 283 composed by healthcare assistants (46%). When looking at healthcare assistants only,  
6  
7  
8 284 seroprevalence in workers from abroad was twice as high (20%) than in workers of Italian  
9  
10 285 ancestry (9.8%).  
11  
12

13 286 What appears from our results is that SARS-CoV-2 transmission largely occurred from close  
14  
15 287 contacts within the hospital in absolute terms (78 HCWs had contact with patients or  
16  
17 288 colleagues, against 19 at home). However, in relative terms the prevalence was higher outside  
18  
19  
20 289 the hospital: in fact, HCWs who reported contacts with suspected or confirmed COVID-19  
21  
22 290 cases within the family had a prevalence of high IgG more than twice that of workers whose  
23  
24 291 contacts were patients or colleagues (20.2% vs 8.8%, respectively). Similar results of family  
25  
26 292 contacts as likely source of infection were reported by Sandri et al. with even higher  
27  
28  
29 293 percentages (31.2%) [16] and were further corroborated by the molecular analyses performed  
30  
31 294 by Sikkema et al. [6].  
32  
33

34 295 Regarding the lower prevalence of positive serologies among smokers, a protective effect of  
35  
36 296 smoking on the risk of infection is unlikely. The lower seroprevalence we observed among  
37  
38 297 smokers might reflect the influence of smoking on major components of both innate and  
39  
40  
41 298 adaptive immune cells [26]. Particularly, a decreased production of IgA, IgG and IgM has  
42  
43 299 been observed in smokers if compared to non-smokers [27].  
44  
45

46 300 In our study, the positivity rate of anti-SARS-CoV-2 IgG in HCWs who had a positive NPS  
47  
48 301 (130/174, 74.7%) is sensibly lower than the values reported by the manufacturer, which  
49  
50 302 reports a sensitivity of 90.7% and 97.9% at 5-15 and >15 days after infection, respectively  
51  
52  
53 303 [14]. On the other hand, we found that 7.4% of workers with negative NPS (175/2,375) had  
54  
55 304  $\text{IgG} \geq 15$  AU/mL. Unfortunately, we are unable to ascertain what proportion is due to lack of  
56  
57  
58 305 NPS sensitivity and what arises from imperfect specificity of IgG test. In fact, our study was  
59  
60

1  
2  
3 306 not designed to assess the sensitivity of the serologic test. Further reports of real-life data are  
4  
5 307 therefore needed.  
6  
7

8 308 Finally, positive serology was associated with a recent history of typical symptoms of SARS-  
9  
10 309 CoV-2 infection, especially taste and smell alterations and fever. These findings corroborate  
11  
12 310 previous observations made by our group who identified taste and smell alterations and fever  
13  
14 311 as the symptoms most frequently reported in HCWs with SARS-Cov-2 positivity on NPS  
15  
16 312 [10]. Other authors confirmed the same observations, suggesting that anosmia is the symptom  
17  
18 313 which better characterizes COVID-19 [16,21,22]. Notably, a large fraction of HCWs with  
19  
20 314 positive serology (84/309, 27.2%) did not report any symptom in the four weeks before the  
21  
22 315 test. This finding is also well-described in COVID-19 epidemiology, where the rate of  
23  
24 316 asymptomatic or pauci-symptomatic infected persons ranges from 1.6% to 56.5% depending  
25  
26 317 on subject characteristics and on the analysed country [28]. Unfortunately, in hospital settings  
27  
28 318 the absence of symptoms makes it difficult to identify infected HCWs and hampers many  
29  
30 319 strategies to control the infection.  
31  
32  
33  
34  
35

36 320 The first limitation of our work has been noted above: this study was performed for health  
37  
38 321 surveillance purposes and thus not designed to evaluate serologic test performance  
39  
40 322 (sensitivity and specificity). Secondly, some degree of recall bias, i.e., under-reporting of  
41  
42 323 mild symptoms which occurred many weeks before serologic test, is a possibility. In this  
43  
44 324 case, we may have overestimated the proportion of asymptomatic workers with elevated IgG.  
45  
46 325 Yet, considering that the study started at the end of April 2020, and that the COVID-19  
47  
48 326 pandemic in Lombardy begun at the end of February, we probably missed only a small  
49  
50 327 percentage of subjects with clinical manifestations. Thirdly, the serologic assessment was not  
51  
52 328 mandatory and was therefore not performed on all HCWs. Nevertheless, considering that the  
53  
54 329 hospital employees are 4,572, our study has involved a large fraction of them (4,055/4,572,  
55  
56 330 88.7%) and thus provides a fair description of SARS-CoV-2 exposure in HCWs of our  
57  
58  
59  
60

1  
2  
3 331 Hospital. Finally, we could not evaluate the serologic status of all HCWs in a single day. As  
4  
5 332 the epidemic was still ongoing, even though on a much smaller scale (the zenith of the  
6  
7  
8 333 infection was in March), we may have missed a few new infections.  
9

10  
11 334 What is suggested by our study, and by those similarly performed in the same area in the  
12  
13 335 context of the ongoing pandemic [16], is that the observed seroprevalence rate reflects the  
14  
15 336 spread of infection in the community served by the hospital. Assuming that PPE is provided  
16  
17 337 and correctly employed by all HCWs, hospitals do not seem to act as an epicentre of the  
18  
19 338 infection. In our study, healthcare assistants showed the highest seroprevalence rate. We do  
20  
21 339 believe that education and training of all HCWs should be strongly supported. Periodic  
22  
23 340 training of correct use of PPE and infection control procedures should be addressed not only  
24  
25 341 to physicians and nurses but also to other healthcare professionals.  
26  
27  
28  
29

30 342 The fact that more than one quarter of SARS-CoV-2 infections occurred unnoticed supports  
31  
32 343 the implementation of systematic testing strategies among HCWs without an ascertained  
33  
34 344 history of infection. Unfortunately, the best testing strategy as well as the timing and setting  
35  
36 345 in which these tests have the highest performance is still uncertain. Future studies should  
37  
38 346 address these gaps of knowledge. As of now, we deem it is important to monitor periodically  
39  
40 347 SARS-CoV-2 serology in HCWs to correlates the seroprevalence rates with those of general  
41  
42 348 population and detect any discrepancy. This will allow to implement timely and effective  
43  
44 349 infection control measures, thus preventing hospitals to become drivers of future COVID-19  
45  
46 350 outbreaks.  
47  
48  
49  
50  
51  
52  
53  
54  
55  
56  
57  
58  
59  
60

1  
2  
3 352 **Contributorship statement:** AL, DM, DC, AB and AG conceived the study. LC, PB, APC,  
4  
5 353 BT, MC, GL, ACP, LR and FC collected the data and performed the serologic survey. DC  
6  
7 354 performed the statistical analyses. AL, DM, DC wrote the first draft of the manuscript. All  
8  
9 355 authors revised the final version of the manuscript.  
10  
11  
12

13 356 **Data sharing statement:** raw data will be provided on reasonable request contacting the  
14  
15 357 corresponding author.  
16  
17

18 358 **Acknowledgments:** We thank the personnel of SPIO (Servizio Prevenzione e Igiene  
19  
20 359 Ospedaliera), S. Adamoli, F. De Palo, M. Gatti, L. Guerrieri, P. Marazzi, B. Marinelli, M.  
21  
22 360 Polonioli, S. Pratò, E. Radice, and D. Serra for their help in data collection.  
23  
24  
25  
26  
27  
28  
29  
30  
31  
32  
33  
34  
35  
36  
37  
38  
39  
40  
41  
42  
43  
44  
45  
46  
47  
48  
49  
50  
51  
52  
53  
54  
55  
56  
57  
58  
59  
60

362 **References**

- 363 1 COVID-19 Map - Johns Hopkins Coronavirus Resource Center.  
364 <https://coronavirus.jhu.edu/map.html>
- 365 2 Chou R, Dana T, Buckley DI, *et al.* Epidemiology of and Risk Factors for Coronavirus  
366 Infection in Health Care Workers: A Living Rapid Review. *Ann Intern Med*  
367 2020;**173**:120–36. doi:10.7326/M20-1632
- 368 3 Lai X, Wang M, Qin C, *et al.* Coronavirus Disease 2019 (COVID-2019) Infection  
369 Among Health Care Workers and Implications for Prevention Measures in a Tertiary  
370 Hospital in Wuhan, China. *JAMA Netw open* 2020;**3**:e209666.  
371 doi:10.1001/jamanetworkopen.2020.9666
- 372 4 Nguyen LH, Drew DA, Joshi AD, *et al.* Risk of COVID-19 among frontline healthcare  
373 workers and the general community: a prospective cohort study. *medRxiv Prepr Serv*  
374 *Heal Sci* Published Online First: 2020. doi:10.1101/2020.04.29.20084111
- 375 5 Gómez-Ochoa SA, Franco OH, Rojas LZ, *et al.* COVID-19 in Healthcare Workers: A  
376 Living Systematic Review and Meta-analysis of Prevalence, Risk Factors, Clinical  
377 Characteristics, and Outcomes. *Am J Epidemiol* Published Online First: 2020.  
378 doi:10.1215/9781478003335-098
- 379 6 Sikkema RS, Pas S, Nieuwenhuijse DF, *et al.* COVID-19 in healthcare workers in  
380 three hospitals in the South of the Netherlands, March 2020. *medRxiv*  
381 2020;**96**:2020.04.26.20079418. doi:10.1101/2020.04.26.20079418
- 382 7 Nandita S. Mani, Budak JZ, Lan KF, *et al.* Prevalence of COVID-19 Infection and  
383 Outcomes Among Symptomatic Healthcare Workers in Seattle, Washington. *Clin*  
384 *Infect Dis* Published Online First: 2020. doi:10.1093/ofid/ofy003/4791932

- 1  
2  
3 385 8 Bergh MFQK den, Buiting AGM, Pas SD, *et al.* SARS-CoV-2 infection in 86  
4  
5 386 healthcare workers in two Dutch hospitals in March. *medRxiv* 2020;:1–16.  
6  
7  
8 387 9 Mohammadi A, Esmaeilzadeh E, Li Y, *et al.* SARS-CoV-2 detection in different  
9  
10 388 respiratory sites: A systematic review and meta-analysis. *EBioMedicine* 2020;:1–20.  
11  
12 389 doi:10.1016/j.ebiom.2020.102903  
13  
14  
15  
16 390 10 Lombardi A, Consonni D, Carugno M, *et al.* Characteristics of 1,573 Healthcare  
17  
18 391 Workers Who Underwent Nasopharyngeal Swab for SARS-CoV-2 in Milano,  
19  
20 392 Lombardy, Italy. *Clin Microbiol Infect* Published Online First: 2020.  
21  
22 393 doi:10.2139/ssrn.3588560  
23  
24  
25  
26 394 11 Tartari E, Saris K, Kenters N, *et al.* Not sick enough to worry? ‘Influenza-like’  
27  
28 395 symptoms and work-related behavior among healthcare workers and other  
29  
30 396 professionals: Results of a global survey. *PLoS One* 2020;15:1–14.  
31  
32 397 doi:10.1371/journal.pone.0232168  
33  
34  
35  
36 398 12 Deeks JJ, Dinnes J, Takwoingi Y, *et al.* Antibody tests for identification of current and  
37  
38 399 past infection with SARS-CoV-2. *Cochrane database Syst Rev* 2020;6:CD013652.  
39  
40 400 doi:10.1002/14651858.CD013652  
41  
42  
43 401 13 Bandera A, Aliberti S, Gualtierotti R, *et al.* COVID-19 network: the response of an  
44  
45 402 Italian reference Institute to research challenges about a new pandemia. *Clin Microbiol*  
46  
47 403 *Infect* Published Online First: 2020. doi:10.1016/j.cmi.2020.06.028  
48  
49  
50  
51 404 14 Diasorin. LIAISON® SARS-CoV-2 S1/S2 IgG Factsheet.  
52  
53  
54 405 15 Sempos CT, Tian L. Adjusting Coronavirus Prevalence Estimates for Laboratory Test  
55  
56 406 Kit Error. *Am J Epidemiol* 2020;21078:1–28.  
57  
58  
59 407 16 Sandri MT, Azzolini E, Torri V, *et al.* IgG serology in health care and administrative  
60



- 1  
2  
3 408 staff populations from 7 hospitals representative of different exposures to SARS-CoV-  
4  
5 409 2 in Lombardy, Italy. *medXriv* 2020.  
6  
7  
8 410 17 Coronavirus: i dati dei test sierologici effettuati nella Bergamasca dal 23 aprile al 3  
9  
10 411 giugno. 2020.  
11  
12  
13 412 18 Valenti L, Bergna A, Pelusi S, *et al.* SARS-CoV-2 seroprevalence trends in healthy  
14  
15 413 blood donors during the COVID-19 Milan outbreak. *medRxiv*  
16  
17 414 2020;:2020.05.11.20098442. doi:10.1101/2020.05.11.20098442  
18  
19  
20  
21 415 19 Korth J, Wilde B, Dolff S, *et al.* SARS-CoV-2-specific antibody detection in  
22  
23 416 healthcare workers in Germany with direct contact to COVID-19 patients. *J Clin Virol*  
24  
25 417 2020;**128**. doi:10.1016/j.jcv.2020.104437  
26  
27  
28  
29 418 20 Xu X, Sun J, Nie S, *et al.* Seroprevalence of immunoglobulin M and G antibodies  
30  
31 419 against SARS-CoV-2 in China. *Nat Med* 2020;**26**. doi:10.1038/s41591-020-0949-6  
32  
33  
34 420 21 Garcia-Basteiro AL, Moncunill G, Tortajada M, *et al.* Seroprevalence of antibodies  
35  
36 421 against SARS-CoV-2 among health care workers in a large Spanish reference hospital.  
37  
38 422 2020;:1–36.  
39  
40  
41 423 22 Rudberg A, Havervall S, Månberg A, *et al.* SARS-CoV-2 exposure , symptoms and  
42  
43 424 seroprevalence in health care workers. 2020.  
44  
45  
46  
47 425 23 Shields AM, Faustini SE, Perez-Toledo M, *et al.* SARS-CoV-2 seroconversion in  
48  
49 426 health care workers. *medXriv* Published Online First: 2020.  
50  
51 427 doi:10.1017/CBO9781107415324.004  
52  
53  
54 428 24 Mansour M, Leven E, Muellers K, *et al.* Prevalence of SARS-CoV-2 Antibodies  
55  
56 429 Among Healthcare Workers at a Tertiary Academic Hospital in New York City. *J Gen*  
57  
58 430 *Intern Med* 2020;:2–3. doi:10.1007/s11606-020-05926-8  
59  
60

- 1  
2  
3 431 25 Ip M, Chan PKS, Lee N, *et al.* Seroprevalence of Antibody to Severe Acute  
4  
5 432 Respiratory Syndrome (SARS)-Associated Coronavirus among Health Care Workers  
6  
7 433 in SARS and Non-SARS Medical Wards. *Clin Infect Dis* 2004;**38**:e116–8.  
8  
9 434 doi:10.1086/421019  
10  
11  
12  
13 435 26 Qiu F, Liang CL, Liu H, *et al.* Impacts of cigarette smoking on immune  
14  
15 436 responsiveness: Up and down or upside down? *Oncotarget* 2017;**8**:268–84.  
16  
17 437 doi:10.18632/oncotarget.13613  
18  
19  
20 438 27 Giuca MR, Pasini M, Tecco S, *et al.* Levels of salivary immunoglobulins and  
21  
22 439 periodontal evaluation in smoking patients. *BMC Immunol* 2014;**15**:2–6.  
23  
24 440 doi:10.1186/1471-2172-15-5  
25  
26  
27  
28 441 28 Gao Z, Xu Y, Sun C, *et al.* A systematic review of asymptomatic infections with  
29  
30 442 COVID-19. *J Microbiol Immunol Infect* 2020;:1–5. doi:10.1016/j.jmii.2020.05.001  
31  
32  
33 443  
34  
35  
36  
37  
38  
39  
40  
41  
42  
43  
44  
45  
46  
47  
48  
49  
50  
51  
52  
53  
54  
55  
56  
57  
58  
59  
60

1  
2  
3 445 **Figures**  
4  
5

6 446 **Figure 1**  
7  
8

9 447 Number of IgG tests (left panel) and percentage of positive IgG tests (right panel) in 162  
10  
11 448 subjects with a positive nasopharyngeal swab prior to serological testing, according to days  
12  
13  
14 449 elapsed since day of first positive nasopharyngeal swab.  
15

16  
17 450 Left panel shows histogram and kernel density smoothing line. In right panel circles indicate  
18 451 subjects with negative (lower circles, N=41) or positive (upper circles, N=121) anti-SARS-  
19 452 CoV-2 IgG, solid and dashed lines are the predicted percentages calculated with a logistic  
20 453 regression model, and dashed lines are 95% bands around the predicted.  
21  
22  
23  
24  
25  
26  
27  
28  
29  
30  
31  
32  
33  
34  
35  
36  
37  
38  
39  
40  
41  
42  
43  
44  
45  
46  
47  
48  
49  
50  
51  
52  
53  
54  
55  
56  
57  
58  
59  
60

1  
2  
3  
4  
5  
6  
7  
8  
9  
10  
11  
12  
13  
14  
15  
16  
17  
18  
19  
20  
21  
22  
23  
24  
25  
26  
27  
28  
29  
30  
31  
32  
33  
34  
35  
36  
37  
38  
39  
40  
41  
42  
43  
44  
45  
46  
47  
48  
49  
50  
51  
52  
53  
54  
55  
56  
57  
58  
59  
60

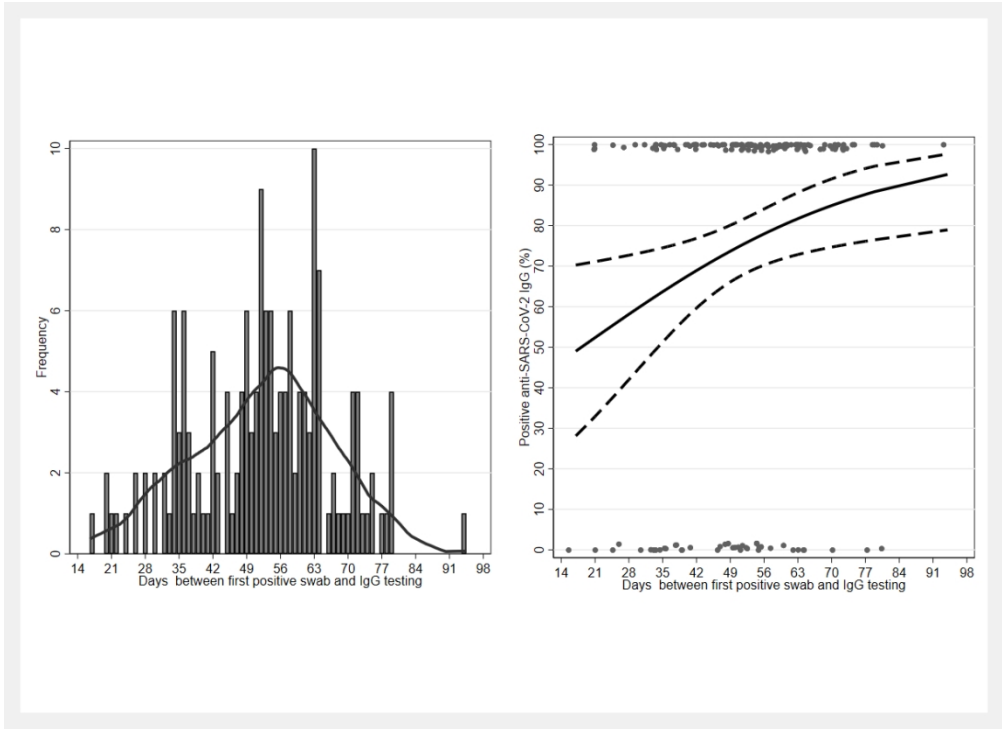

434x316mm (72 x 72 DPI)

✓STROBE Statement—Checklist of items that should be included in reports of *cohort studies*

|                              | Item No | Recommendation                                                                                                                                                                                                                                                                                                                                                                                                |
|------------------------------|---------|---------------------------------------------------------------------------------------------------------------------------------------------------------------------------------------------------------------------------------------------------------------------------------------------------------------------------------------------------------------------------------------------------------------|
| <b>Title and abstract</b>    | 1✓      | (a) Indicate the study's design with a commonly used term in the title or the abstract<br>(b) Provide in the abstract an informative and balanced summary of what was done and what was found                                                                                                                                                                                                                 |
| <b>Introduction</b>          |         |                                                                                                                                                                                                                                                                                                                                                                                                               |
| Background/rationale         | 2✓      | Explain the scientific background and rationale for the investigation being reported                                                                                                                                                                                                                                                                                                                          |
| Objectives                   | 3✓      | State specific objectives, including any prespecified hypotheses                                                                                                                                                                                                                                                                                                                                              |
| <b>Methods</b>               |         |                                                                                                                                                                                                                                                                                                                                                                                                               |
| Study design                 | 4✓      | Present key elements of study design early in the paper                                                                                                                                                                                                                                                                                                                                                       |
| Setting                      | 5✓      | Describe the setting, locations, and relevant dates, including periods of recruitment, exposure, follow-up, and data collection                                                                                                                                                                                                                                                                               |
| Participants                 | 6✓      | (a) Give the eligibility criteria, and the sources and methods of selection of participants. Describe methods of follow-up<br>(b) For matched studies, give matching criteria and number of exposed and unexposed                                                                                                                                                                                             |
| Variables                    | 7✓      | Clearly define all outcomes, exposures, predictors, potential confounders, and effect modifiers. Give diagnostic criteria, if applicable                                                                                                                                                                                                                                                                      |
| Data sources/<br>measurement | 8*✓     | For each variable of interest, give sources of data and details of methods of assessment (measurement). Describe comparability of assessment methods if there is more than one group                                                                                                                                                                                                                          |
| Bias                         | 9✓      | Describe any efforts to address potential sources of bias                                                                                                                                                                                                                                                                                                                                                     |
| Study size                   | 10✓     | Explain how the study size was arrived at                                                                                                                                                                                                                                                                                                                                                                     |
| Quantitative variables       | 11      | Explain how quantitative variables were handled in the analyses. If applicable, describe which groupings were chosen and why                                                                                                                                                                                                                                                                                  |
| Statistical methods          | 12✓     | (a) Describe all statistical methods, including those used to control for confounding<br>(b) Describe any methods used to examine subgroups and interactions<br>(c) Explain how missing data were addressed<br>(d) If applicable, explain how loss to follow-up was addressed<br>(e) Describe any sensitivity analyses                                                                                        |
| <b>Results</b>               |         |                                                                                                                                                                                                                                                                                                                                                                                                               |
| Participants                 | 13*✓    | (a) Report numbers of individuals at each stage of study—eg numbers potentially eligible, examined for eligibility, confirmed eligible, included in the study, completing follow-up, and analysed<br>(b) Give reasons for non-participation at each stage<br>(c) Consider use of a flow diagram                                                                                                               |
| Descriptive data             | 14*✓    | (a) Give characteristics of study participants (eg demographic, clinical, social) and information on exposures and potential confounders<br>(b) Indicate number of participants with missing data for each variable of interest<br>(c) Summarise follow-up time (eg, average and total amount)                                                                                                                |
| Outcome data                 | 15*✓    | Report numbers of outcome events or summary measures over time                                                                                                                                                                                                                                                                                                                                                |
| Main results                 | 16✓     | (a) Give unadjusted estimates and, if applicable, confounder-adjusted estimates and their precision (eg, 95% confidence interval). Make clear which confounders were adjusted for and why they were included<br>(b) Report category boundaries when continuous variables were categorized<br>(c) If relevant, consider translating estimates of relative risk into absolute risk for a meaningful time period |

|    |                          |     |                                                                                        |
|----|--------------------------|-----|----------------------------------------------------------------------------------------|
| 1  | Other analyses           | 17✓ | Report other analyses done—eg analyses of subgroups and interactions, and              |
| 2  |                          |     | sensitivity analyses                                                                   |
| 3  |                          |     |                                                                                        |
| 4  | <b>Discussion</b>        |     |                                                                                        |
| 5  | Key results              | 18✓ | Summarise key results with reference to study objectives                               |
| 6  | Limitations              | 19✓ | Discuss limitations of the study, taking into account sources of potential bias or     |
| 7  |                          |     | imprecision. Discuss both direction and magnitude of any potential bias                |
| 8  |                          |     |                                                                                        |
| 9  | Interpretation           | 20✓ | Give a cautious overall interpretation of results considering objectives, limitations, |
| 10 |                          |     | multiplicity of analyses, results from similar studies, and other relevant evidence    |
| 11 | Generalisability         | 21✓ | Discuss the generalisability (external validity) of the study results                  |
| 12 |                          |     |                                                                                        |
| 13 | <b>Other information</b> |     |                                                                                        |
| 14 | Funding                  | 22✓ | Give the source of funding and the role of the funders for the present study and, if   |
| 15 |                          |     | applicable, for the original study on which the present article is based               |
| 16 |                          |     |                                                                                        |

17  
18 \*Give information separately for exposed and unexposed groups.

19  
20  
21 **Note:** An Explanation and Elaboration article discusses each checklist item and gives methodological background and  
22 published examples of transparent reporting. The STROBE checklist is best used in conjunction with this article (freely  
23 available on the Web sites of PLoS Medicine at <http://www.plosmedicine.org/>, Annals of Internal Medicine at  
24 <http://www.annals.org/>, and Epidemiology at <http://www.epidem.com/>). Information on the STROBE Initiative is  
25 available at <http://www.strobe-statement.org>.  
26  
27  
28  
29  
30  
31  
32  
33  
34  
35  
36  
37  
38  
39  
40  
41  
42  
43  
44  
45  
46  
47  
48  
49  
50  
51  
52  
53  
54  
55  
56  
57  
58  
59  
60

# BMJ Open

## Seroprevalence of anti-SARS-CoV-2 IgG among health-care workers of a large university Hospital in Milan, Lombardy, Italy

|                                 |                                                                                                                                                                                                                                                                                                                                                                                                                                                                                                                                                                                                                                                                                                                                                                                                                                                                                                                                                                                                                                                                                                                                                                                                                                                                                                                                                                                                                                                                                                                                                                              |
|---------------------------------|------------------------------------------------------------------------------------------------------------------------------------------------------------------------------------------------------------------------------------------------------------------------------------------------------------------------------------------------------------------------------------------------------------------------------------------------------------------------------------------------------------------------------------------------------------------------------------------------------------------------------------------------------------------------------------------------------------------------------------------------------------------------------------------------------------------------------------------------------------------------------------------------------------------------------------------------------------------------------------------------------------------------------------------------------------------------------------------------------------------------------------------------------------------------------------------------------------------------------------------------------------------------------------------------------------------------------------------------------------------------------------------------------------------------------------------------------------------------------------------------------------------------------------------------------------------------------|
| Journal:                        | <i>BMJ Open</i>                                                                                                                                                                                                                                                                                                                                                                                                                                                                                                                                                                                                                                                                                                                                                                                                                                                                                                                                                                                                                                                                                                                                                                                                                                                                                                                                                                                                                                                                                                                                                              |
| Manuscript ID                   | bmjopen-2020-047216.R1                                                                                                                                                                                                                                                                                                                                                                                                                                                                                                                                                                                                                                                                                                                                                                                                                                                                                                                                                                                                                                                                                                                                                                                                                                                                                                                                                                                                                                                                                                                                                       |
| Article Type:                   | Original research                                                                                                                                                                                                                                                                                                                                                                                                                                                                                                                                                                                                                                                                                                                                                                                                                                                                                                                                                                                                                                                                                                                                                                                                                                                                                                                                                                                                                                                                                                                                                            |
| Date Submitted by the Author:   | 30-Jan-2021                                                                                                                                                                                                                                                                                                                                                                                                                                                                                                                                                                                                                                                                                                                                                                                                                                                                                                                                                                                                                                                                                                                                                                                                                                                                                                                                                                                                                                                                                                                                                                  |
| Complete List of Authors:       | Lombardi, Andrea; Fondazione IRCCS Ca' Granda Ospedale Maggiore Policlinico, Infectious Diseases<br>Mangioni, Davide; Fondazione IRCCS Ca' Granda Ospedale Maggiore Policlinico, Infectious Diseases<br>Consonni, Dario; Fondazione IRCCS Ca' Granda – Ospedale Maggiore Policlinico, Epidemiology Unit<br>Cariani, Lisa; Fondazione IRCCS Ca' Granda Ospedale Maggiore Policlinico, Clinical Laboratory<br>Bono, Patrizia; Fondazione IRCCS Ca' Granda Ospedale Maggiore Policlinico, Clinical Laboratory<br>Cantù, Anna; Fondazione IRCCS Ca' Granda Ospedale Maggiore Policlinico, Medical Direction<br>Tiso, Basilio; Fondazione IRCCS Ca' Granda Ospedale Maggiore Policlinico, Medical Direction<br>Carugno, Michele; Università degli Studi di Milano, Department of Clinical Sciences and Community Health<br>Muscatello, Antonio; Fondazione IRCCS Ca' Granda Ospedale Maggiore Policlinico, Infectious Diseases<br>Lunghi, Giovanna; Fondazione IRCCS Ca' Granda Ospedale Maggiore Policlinico, Infectious Diseases<br>Pesatori, Angela; University of Milan, Italy, Occupational and Environmental Health<br>Riboldi, Luciano; Fondazione IRCCS Ca' Granda – Ospedale Maggiore Policlinico, Department of Preventive Medicine, Unit of Epidemiology<br>Ceriotti, Ferruccio; Fondazione IRCCS Ca' Granda Ospedale Maggiore Policlinico, Clinical Laboratory<br>Bandera, Alessandra; Fondazione IRCCS Ca' Granda Ospedale Maggiore Policlinico, Infectious Diseases<br>Gori, Andrea; Fondazione IRCCS Ca' Granda Ospedale Maggiore Policlinico, Infectious Diseases |
| <b>Primary Subject Heading</b>: | Epidemiology                                                                                                                                                                                                                                                                                                                                                                                                                                                                                                                                                                                                                                                                                                                                                                                                                                                                                                                                                                                                                                                                                                                                                                                                                                                                                                                                                                                                                                                                                                                                                                 |
| Secondary Subject Heading:      | Infectious diseases                                                                                                                                                                                                                                                                                                                                                                                                                                                                                                                                                                                                                                                                                                                                                                                                                                                                                                                                                                                                                                                                                                                                                                                                                                                                                                                                                                                                                                                                                                                                                          |
| Keywords:                       | OCCUPATIONAL & INDUSTRIAL MEDICINE, VIROLOGY, Diagnostic microbiology < INFECTIOUS DISEASES, Public health < INFECTIOUS DISEASES                                                                                                                                                                                                                                                                                                                                                                                                                                                                                                                                                                                                                                                                                                                                                                                                                                                                                                                                                                                                                                                                                                                                                                                                                                                                                                                                                                                                                                             |

1  
2  
3  
4  
5  
6  
7  
8  
9  
10  
11  
12  
13  
14  
15  
16  
17  
18  
19  
20  
21  
22  
23  
24  
25  
26  
27  
28  
29  
30  
31  
32  
33  
34  
35  
36  
37  
38  
39  
40  
41  
42  
43  
44  
45  
46  
47  
48  
49  
50  
51  
52  
53  
54  
55  
56  
57  
58  
59  
60

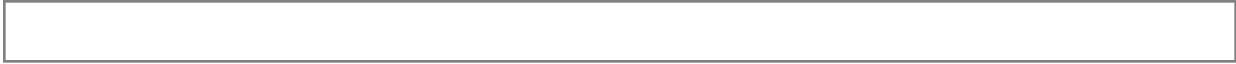

SCHOLARONE™  
Manuscripts





I, the Submitting Author has the right to grant and does grant on behalf of all authors of the Work (as defined in the below author licence), an exclusive licence and/or a non-exclusive licence for contributions from authors who are: i) UK Crown employees; ii) where BMJ has agreed a CC-BY licence shall apply, and/or iii) in accordance with the terms applicable for US Federal Government officers or employees acting as part of their official duties; on a worldwide, perpetual, irrevocable, royalty-free basis to BMJ Publishing Group Ltd ("BMJ") its licensees and where the relevant Journal is co-owned by BMJ to the co-owners of the Journal, to publish the Work in this journal and any other BMJ products and to exploit all rights, as set out in our [licence](#).

The Submitting Author accepts and understands that any supply made under these terms is made by BMJ to the Submitting Author unless you are acting as an employee on behalf of your employer or a postgraduate student of an affiliated institution which is paying any applicable article publishing charge ("APC") for Open Access articles. Where the Submitting Author wishes to make the Work available on an Open Access basis (and intends to pay the relevant APC), the terms of reuse of such Open Access shall be governed by a Creative Commons licence – details of these licences and which [Creative Commons](#) licence will apply to this Work are set out in our licence referred to above.

Other than as permitted in any relevant BMJ Author's Self Archiving Policies, I confirm this Work has not been accepted for publication elsewhere, is not being considered for publication elsewhere and does not duplicate material already published. I confirm all authors consent to publication of this Work and authorise the granting of this licence.

1  
2  
3 1 **Seroprevalence of anti-SARS-CoV-2 IgG among health-care workers of a large**  
4  
5 2 **university Hospital in Milan, Lombardy, Italy**  
6  
7

8 3 Andrea Lombardi<sup>1\*</sup>, Davide Mangioni<sup>1\*</sup>, Dario Consonni<sup>2</sup>, Lisa Cariani<sup>3</sup>, Patrizia Bono<sup>3</sup>,  
9 4 Anna Paola Cantù<sup>4</sup>, Basilio Tiso<sup>4</sup>, Michele Carugno<sup>2,5</sup>, Antonio Muscatello<sup>1</sup>, Giovanna  
10 5 Lunghi<sup>3</sup>, Angela Cecilia Pesatori<sup>2,5</sup>, Luciano Riboldi<sup>6</sup>, Ferruccio Ceriotti<sup>3</sup>, Alessandra  
11 6 Bandera<sup>1,7,8</sup>, Andrea Gori<sup>1,7</sup>  
12  
13  
14  
15  
16  
17

18 7 *<sup>1</sup>Infectious Diseases Unit, Foundation IRCCS Ca' Granda Ospedale Maggiore Policlinico,*  
19 8 *Milan, Italy; <sup>2</sup>Epidemiology Unit, Foundation IRCCS Ca' Granda Ospedale Maggiore*  
20 9 *Policlinico, Milan, Italy; <sup>3</sup>Clinical Laboratory, Foundation IRCCS Ca' Granda Ospedale*  
21 10 *Maggiore, Milan, Italy; <sup>4</sup>Medical Direction, Foundation IRCCS Ca' Granda Ospedale*  
22 11 *Maggiore Policlinico, Milan, Italy; <sup>5</sup>Department of Clinical Sciences and Community Health,*  
23 12 *University of Milano, Milan, Italy; <sup>6</sup>Occupational Health Unit, Foundation IRCCS Ca'*  
24 13 *Granda Ospedale Maggiore Policlinico, Milan, Italy; <sup>7</sup>Centre for Multidisciplinary Research*  
25 14 *in Health Science (MACH), University of Milan, Milan, Italy; <sup>8</sup> Department of*  
26 15 *Pathophysiology and Transplantation, University of Milan, Milan, Italy.*  
27  
28  
29  
30  
31  
32  
33  
34  
35  
36  
37  
38  
39

40 16 \*Shared first authorship.

41  
42 17 **Corresponding author:** Andrea Lombardi, MD, Infectious Diseases Unit, Foundation  
43 18 IRCCS Ca' Granda Ospedale Maggiore Policlinico Via Francesco Sforza 35, 20122 Milan,  
44 19 Italy. E-mail: [andrealombi89@gmail.com](mailto:andrealombi89@gmail.com) Tel: +390255034767  
45  
46  
47  
48  
49

50 20 **Abstract electronic words count:** 293

51  
52  
53 21 **Main text electronic words count:** 3,353  
54  
55  
56  
57  
58  
59  
60

## 23 Abstract

24 **Objectives** To assess the seroprevalence of anti-SARS-CoV-2 IgG among HCWs in our  
25 university hospital and verify the risk of acquiring the infection according to work area.

26 **Design** Cross-sectional observational study

27 **Setting** Monocentric, Italian third-level university hospital

28 **Participants** All the employees of the hospital on a voluntary base for a total of 4,055  
29 participants among 4,572 HCWs (88.7%).

30 **Primary and secondary outcome measures** Number of anti-SARS-CoV-2 positive serology  
31 according to working area. Association of anti-SARS-CoV-2 positive serology according to  
32 selected variables (age, gender, country of origin, BMI, smoking, symptoms, contact with  
33 confirmed cases).

34 **Results** From April 27 to June 12, 2020, 4,055 HCWs were tested and 309 (7.6%) had a  
35 serologic positive test. No relevant difference was found between men and women (8.3% vs  
36 7.3%,  $p=0.3$ ), whereas a higher prevalence was observed among foreign-born workers  
37 (27/186, 14.5%,  $p<0.001$ ), employees younger than 30 (64/668, 9.6%,  $p=0.02$ ) or older than  
38 60 years (38/383, 9.9%,  $p=0.02$ ) and among healthcare assistants (40/320, 12.5%,  $p=0.06$ ).  
39 Working as frontline HCWs was not associated with an increased frequency of positive  
40 serology ( $p=0.42$ ). A positive association was found with presence and number of symptoms  
41 ( $p<0.001$ ). The symptoms most frequently associated with a positive serology were taste and  
42 smell alterations (OR 4.62, 95% CI 2.99-7.15) and fever (OR 4.37, 95% CI 3.11-6.13). No  
43 symptoms were reported in 84/309 (27.2%) HCWs with positive IgG levels. Declared  
44 exposure to a suspected/confirmed case was more frequently associated ( $p<0.001$ ) with  
45 positive serology when the contact was a family member (19/94, 20.2%) than a patient or  
46 colleague (78/888, 8.8%).

1  
2  
3 47 **Conclusions** SARS-CoV-2 infection occurred undetected in a large fraction of HCWs and it  
4  
5 48 was not associated with working in COVID-19 frontline areas. Beyond the hospital setting,  
6  
7 49 exposure within the community represents an additional source of infection for HCWs.  
8  
9  
10  
11 50

12  
13  
14 51 **Strengths and limitations of this study**

- 15  
16  
17 52 • The serologic test employed in our study has, after >15 days from the infection, a  
18  
19 53 declared sensitivity of 97.4% and a specificity of 98.5%.
- 20  
21  
22 54 • We performed our study on a large cohort of healthcare workers, from an area with a  
23  
24 55 high incidence of COVID-19.
- 25  
26  
27 56 • Our study was monocentric and performed in Italy, therefore the results may be  
28  
29 57 applicable only to similar scenarios (e.g. Western countries with public health  
30  
31 58 system).  
32  
33  
34  
35 59

36  
37  
38 60 **Keywords:** occupational exposure; screening; nosocomial transmission; SARS-COV-2;  
39  
40 61 COVID-19.  
41  
42  
43 62

44  
45  
46 63 **Funding:** none related to the content of this manuscript.  
47  
48

49 64 **Conflict of interests:** none related to the content of this manuscript.  
50  
51  
52  
53  
54  
55  
56  
57  
58  
59  
60

## 66 **Introduction**

67 As of January 2021, the ongoing pandemic of coronavirus disease 2019 (COVID-19) caused  
68 by the severe acute respiratory syndrome coronavirus 2 (SARS-CoV-2) has affected more  
69 than 100 million people worldwide resulting in more than 2 million deaths [1]. Since the  
70 beginning of the pandemic, healthcare workers (HCWs) has been identified as a group at high  
71 risk of infection [2]. The occurrence of nosocomial transmission of SARS-CoV-2 has been  
72 well described, emphasizing the adherence to infection control measures among HCWs to  
73 protect themselves and avoid nosocomial outbreaks [2–5]. Conversely, other studies did not  
74 find differences in SARS-CoV-2 infection rates between frontline and non-frontline HCWs  
75 and between HCWs and the general population, suggesting community over nosocomial  
76 acquisition as major source of infection [6–8].

77 In the current pandemic scenario, the optimal method to screen HCWs is still under debate.  
78 At present, the most frequently employed testing strategy is the detection of SARS-CoV-2  
79 RNA through reverse transcriptase–polymerase chain reaction (RT-PCR) on upper  
80 respiratory specimens in symptomatic individuals or in those exposed to confirmed cases of  
81 COVID-19. Unfortunately, the testing strategy based solely on upper respiratory specimens  
82 has significant limitations. In a large meta-analysis, the rate of positive nasopharyngeal swabs  
83 (NPS) ranged from 25% to 80% and decreased with time and in asymptomatic or pauci-  
84 symptomatic cases [9]. Of note, no data on test sensitivity in asymptomatic infected  
85 individuals exists, and clinical symptoms of COVID-19 among infected HCWs are often  
86 relatively mild, with fever and dyspnoea reported in 38-60% and 13-47% of cases,  
87 respectively [2,3,7,8,10]. It is also not uncommon for HCWs to work with mild symptoms  
88 [8,11], which increases the hazard of nosocomial outbreaks.

1  
2  
3 89 More recently, the serologic assessment of SARS-CoV-2 infection has been proposed as  
4  
5 90 screening strategy among both HCWs and the general population. Antibody sensitivity is  
6  
7  
8 91 30% one week after symptoms onset and rises to 70% and >90% at 2 and 3 weeks,  
9  
10 92 respectively [12]. Hence, the most useful role for serology consists in detecting previous  
11  
12 93 SARS-CoV-2 infection as screening strategy in exposed or high-risk HCWs. Little is known  
13  
14 94 about the duration of humoral immune response to SARS-CoV-2 infection. In some studies  
15  
16 95 antibody titers did not decline within 6 months after diagnosis [13–15]. Conversely, others  
17  
18 96 have reported a rapid waning over 3–4 months [16,17].

19  
20  
21  
22 97 Here we present the results of SARS-CoV-2 serology assessment performed on HCWs from  
23  
24 98 April 27, 2020 to June 12, 2020 at the Fondazione IRCCS Ca' Granda Ospedale Maggiore  
25  
26 99 Policlinico located in Milan, Lombardy, by far the Italian region mostly affected by COVID-  
27  
28 100 19. To cope with the COVID-19 emergency, the organization of our hospital has been  
29  
30 101 modified, and different wards have been entirely dedicated to the management of COVID-19  
31  
32 102 patients to accommodate 350 of them [18]. We evaluated the association between positive  
33  
34 103 tests and demographic characteristics, occupation and working environment (frontline vs non-  
35  
36 104 frontline HCWs). In addition, we assessed the frequency of positive tests in HCWs with  
37  
38 105 previous symptoms of COVID-19 or who had been quarantined or in contact with suspected  
39  
40 106 or proven COVID-19 cases.

## 41 42 43 44 45 107 **Methods**

46  
47  
48  
49 108 We collected occupational and clinical characteristics of all the consecutive HCWs who  
50  
51 109 performed a serologic assay for SARS-CoV-2 at the Fondazione IRCCS Ca' Granda  
52  
53 110 Ospedale Maggiore Policlinico in Milan, Italy from April 27 to June 12, 2020. Of note, the  
54  
55 111 first documented case of COVID-19 in our hospital occurred on February 23, 2020.  
56  
57 112 Policlinico hospital is one of the leading Italian hospitals in clinical and research activities  
58  
59  
60

1  
2  
3 113 located in Milan, northern Italy, with more than 4,750 HCWs, 900 beds and 36,000  
4  
5 114 hospitalization per year. From 21 February 2020, to cope with the COVID-19 emergency, the  
6  
7 115 hospital organization was quickly modified with the installation of four different pavilions  
8  
9 116 entirely dedicated to the management of COVID-19 patients to accommodate 350 patients, of  
10  
11 117 which 50 in intensive care units (13). Specific clinical pathways for COVID-19 patients were  
12  
13 118 created for critical settings (*i.e.*, triage and emergency ward, operating rooms, radiology  
14  
15 119 department) and several internal guidelines were implemented and periodically updated.  
16  
17 120 Trainings on donning and doffing of personal protective equipment (PPE) were provided by  
18  
19 121 the infectious disease specialists and anaesthesiologists to the HCWs working in COVID-19  
20  
21 122 areas. Trainings were targeted to physicians, nurses and health assistants and consisted in  
22  
23 123 brief reviews on COVID-19 clinical and epidemiological issues, set-up of COVID-19 wards  
24  
25 124 in contaminated, buffer and clean areas, guidance on proper use of PPE in patient daily care  
26  
27 125 and in specific situations (*i.e.*, patient transportation, dialysis, surgical interventions including  
28  
29 126 childbirth).

30  
31  
32  
33  
34  
35  
36 127 The serologic assay was offered freely to all hospital HCWs. At blood drawing, HCWs were  
37  
38 128 asked to complete a questionnaire containing demographics, occupational and clinical  
39  
40 129 characteristics. Information on age, gender, nationality, body mass index (BMI), smoking and  
41  
42 130 comorbidities (hypertension, diabetes, immunosuppressive therapies, cardiac, respiratory or  
43  
44 131 renal chronic diseases) was registered. HCWs were stratified by working environment in  
45  
46 132 frontline and non-frontline workers (whether they provided direct assistance to COVID-19  
47  
48 133 patients or not) and by job title in physicians (including residents), nurses and midwives,  
49  
50 134 healthcare assistants, health technicians, and clerical workers and technicians. The presence  
51  
52 135 of any of the following symptoms since the end of February 2020 was collected: fever,  
53  
54 136 cough, dyspnoea, diarrhoea, nausea or vomit, ageusia/dysgeusia or anosmia/parosmia,  
55  
56  
57  
58 137 rhinorrhoea, ocular symptoms, sore throat, headache, myalgia, and asthenia. The presence of  
59  
60

1  
2  
3 138 any of the following indicators of previous exposure to SARS-CoV-2 was investigated:  
4  
5 139 previous NPS (date and results), prophylaxis for SARS-CoV-2 infection (day and type of  
6  
7 140 medication), home quarantine (period), and contact with suspected or proven COVID-19  
8  
9 141 cases (date and type of exposure).  
10  
11  
12

13 142 The study was approved by the institutional review board (368\_2020bis) of our hospital and  
14  
15 143 was conducted in accordance with the Helsinki Declaration.  
16  
17

#### 18 144 *SARS-CoV-2 serology*

19  
20  
21 145 SARS-CoV-2 serology was performed with LIAISON® SARS-CoV-2 S1/S2 IgG test on  
22  
23 146 LIAISON® XL (DiaSorin, Saluggia, Italy). The test is a chemiluminescent immunoassay  
24  
25 147 (CLIA) that detects quantitative anti-S1 and anti-S2 specific IgG antibodies against SARS-  
26  
27 148 CoV-2 in human serum. The test has, after >15 days from the infection, a declared sensitivity  
28  
29 149 of 97.4%, and a specificity of 98.5%. A test was considered positive when the value observed  
30  
31 150 was equal to or above 15 AU/mL [19].  
32  
33  
34  
35

#### 36 151 *Statistical analysis*

37  
38  
39 152 We calculated the adjusted seroprevalence using the formula: adjusted prevalence =  
40  
41 153 (observed prevalence + specificity – 1)/(sensitivity + specificity – 1) [20], where sensitivity  
42  
43 154 and specificity were those declared by the manufacturer.  
44  
45

46 155 We compared the prevalence of positive tests according to selected variables using chi-  
47  
48 156 squared tests. We then calculated odds ratios (OR) and 95% confidence intervals (CI) by  
49  
50 157 fitting a multivariable logistic regression model containing the following covariates: country  
51  
52 158 of origin, gender, age class, occupation, frontline work, BMI class, and cigarette smoking.  
53  
54 159 For other variables (quarantine, symptoms, contact with COVID-19 case,  
55  
56 160 prophylaxis/therapy, and NPS), we used univariate logistic models. We evaluated the  
57  
58 161 discriminating ability of the number of reported symptoms in a multivariable logistic  
59  
60



1  
2  
3 162 regression model containing all groups of symptoms. Area under the ROC curve (AUC) was  
4  
5 163 calculated after these models. To verify possible changes in IgG positivity over time, among  
6  
7 164 HCWs with a previous positive NPS, we analysed the percentage of subjects with elevated  
8  
9 165 IgG levels according to the days elapsed since the first positive NPS using logistic regression.  
10  
11  
12 166 Statistical analysis was performed with Stata 16 (StataCorp. 2019).

### 15 167 *Patient and Public Involvement*

17  
18 168 The serologic assessment was freely offered to all the healthcare workers of our hospital. The  
19  
20 169 majority of them (4,055/4,572, 88.7%) participated and autonomously completed a  
21  
22  
23 170 questionnaire.

### 26 171 **Results**

27  
28  
29 172 From April 27 to June 12, 2020, 4,055 HCWs with a mean age of 44.8 years, 2,823 women  
30  
31 173 (69.6%) and 1,232 men (30.4%), provided a blood sample and completed the questionnaire.  
32  
33 174 The majority were physicians/residents (1,292/4,055, 31.9%) and nurses/midwives  
34  
35 175 (1,230/4,055, 30.3%). The overall frequency of workers with a positive test was 309/4,055  
36  
37 176 (7.6%; 95% CI: 6.8-8.5%) (Table 1). The prevalence adjusted for declared test sensitivity and  
38  
39  
40 177 specificity would be 6.4%. The frequency of positive tests was almost double among workers  
41  
42 178 from abroad (14.5%) compared to those of Italian ancestry (7.3%), whereas women and men  
43  
44 179 had a similar prevalence. The highest frequencies of a positive test were observed in the  
45  
46  
47 180 lowest (<30 years) and highest ( $\geq 60$  years) age classes. Across HCWs' job titles, a significant  
48  
49 181 higher prevalence was detected among healthcare assistants (40/320, 12.5%), while weak  
50  
51 182 differences were found for the other occupations (6.0% to 8.0%). No difference was observed  
52  
53 183 between frontline and non-frontline HCWs (7.2% vs 7.9%). There was a positive trend of test  
54  
55 184 positivity according to BMI, while current smokers had less than half the prevalence of test  
56  
57 185 positivity than former and never smokers (4.0%, 8.9% and 8.5%, respectively). No  
58  
59  
60

186 association was found between test results and comorbidities (hypertension, diabetes, cardiac,  
187 respiratory, or renal chronic diseases) or being on immunosuppressive treatment (data not  
188 shown). All findings of the univariate analyses were confirmed in the multivariable analysis.

189 **Table 1.** Association between selected variables and prevalence of positive tests (anti-SARS-  
190 CoV-2 IgG $\geq$ 15 AU/mL) among healthcare workers in a large university hospital, Milan,  
191 Italy, April 27 to June 12, 2020.

| Variable                        | Workers | Positive test |      |          |      |           |
|---------------------------------|---------|---------------|------|----------|------|-----------|
|                                 | N       | N             | %    | p-value* | OR** | 95% CI**  |
| All                             | 4,055   | 309           | 7.6  |          |      |           |
| Country of origin               |         |               |      |          |      |           |
| Italy                           | 3,869   | 282           | 7.3  | <0.001   | 1.00 | Reference |
| Other                           | 186     | 27            | 14.5 |          | 1.82 | 1.07-3.06 |
| Gender                          |         |               |      |          |      |           |
| Women                           | 2,823   | 207           | 7.3  | 0.30     | 1.00 | Reference |
| Men                             | 1,232   | 102           | 8.3  |          | 1.13 | 0.85-1.52 |
| Age (years)                     |         |               |      |          |      |           |
| <30                             | 668     | 64            | 9.6  | 0.02     | 1.00 | Reference |
| 30-39                           | 1,018   | 78            | 7.7  |          | 0.74 | 0.51-1.07 |
| 40-49                           | 858     | 48            | 5.6  |          | 0.46 | 0.30-0.72 |
| 50-59                           | 1,128   | 81            | 7.2  |          | 0.64 | 0.43-0.95 |
| 60+                             | 383     | 38            | 9.9  |          | 0.83 | 0.50-1.36 |
| Occupation                      |         |               |      |          |      |           |
| Physicians, including residents | 1,292   | 93            | 7.2  | 0.006    | 0.99 | 0.64-1.53 |
| Nurses, midwives                | 1,230   | 99            | 8.0  |          | 1.31 | 0.85-2.04 |
| Healthcare assistants           | 320     | 40            | 12.5 |          | 1.84 | 1.04-3.25 |
| Health technicians***           | 585     | 35            | 6.0  |          | 0.84 | 0.50-1.40 |
| Clerical workers, technicians   | 628     | 42            | 6.7  |          | 1.00 | Reference |
| Frontline HCWs                  |         |               |      |          |      |           |
| Never                           | 2,061   | 149           | 7.2  | 0.42     | 1.00 | Reference |
| Ever                            | 1,730   | 137           | 7.9  |          | 0.92 | 0.69-1.24 |
| Missing                         | 264     | 23            | 8.7  |          |      |           |
| BMI                             |         |               |      |          |      |           |
| <20                             | 684     | 46            | 6.7  | 0.04     | 0.90 | 0.62-1.32 |
| 20-24.99                        | 2,035   | 145           | 7.1  |          | 1.00 | Reference |
| 25-29.99                        | 945     | 79            | 8.4  |          | 1.10 | 0.80-1.52 |
| 30+                             | 314     | 31            | 9.9  |          | 1.52 | 0.98-2.35 |
| Missing                         | 77      | 8             | 10.4 |          |      |           |
| Cigarette smoking               |         |               |      |          |      |           |
| Never                           | 2,493   | 210           | 8.4  | <0.001   | 1.00 | Reference |

|         |     |    |     |  |      |           |
|---------|-----|----|-----|--|------|-----------|
| Former  | 552 | 49 | 8.9 |  | 1.12 | 0.79-1.58 |
| Current | 842 | 34 | 4.0 |  | 0.41 | 0.27-0.61 |
| Missing | 168 | 16 | 9.5 |  |      |           |

192 Abbreviations: BMI, body mass index; CI, confidence interval; OR, odds ratio.

193 \*From chi-squared test. For BMI: from chi-squared test for trend. Missing data not included  
194 in analyses.

195 \*\*From a multivariable logistic regression model including country of origin, gender, age,  
196 occupation, frontline area, BMI, and smoking. Missing data not included in analyses.

197 \*\*\*Includes biologists, radiology and laboratory technicians, psychologists, other health  
198 technicians

199

200 Serology results stratified according to risk factors for previous exposure to SARS-CoV-2 are

201 reported in Table 2. A significant higher seropositivity was found among HCWs who had

202 been quarantined (166/426=39.0%, OR=15.6 95% CI: 12.0-20.1), who had taken antiviral

203 drugs as treatment or prophylaxis (44/135=32.3%, OR=6.59, 95%CI: 4.51-9.65) and who had

204 reported any symptom of SARS-Cov-2 infection in the preceding four weeks

205 (225/1,511=14.9%, OR=5.12, 95%CI: 3.95-6.64). We observed a clear monotonic increasing

206 trend in test positivity with number of symptoms, from 56/608 (9.2%) among HCWs with

207 just one symptom to 62/170 (36.5%) in those with five or more. Conversely, no symptom was

208 reported in 84/309 HCWs with positive serologic test (27.2%). The prevalence of positive

209 tests was 5.6% (134/2,372) in HCWs who did not report contacts with a person with COVID-

210 19 and 10.1% (154/1,525) in those who reported contacts with suspected or confirmed cases.

211 Of note, prevalence of IgG positivity more than doubled if the reported contact was a family

212 member (19/94=20.2%) compared to a patient or a colleague (78/888=8.8%). HCWs who had

213 undergone SARS-CoV-2 NPS with negative result had a frequency of positive serology of

214 7.4% (175/2,375), almost the same as the overall hospital seroprevalence. On the contrary,

215 the percentage of IgG positivity was much higher (74.7%, 130/174) in those who had a

216 positive NPS. In 162 subjects NPS had been performed before serology, while in 12 HCWs

217 NPS was performed after the detection of a positive serology. Only four workers among the

218 1,506 who had never performed NPS (0.3%) had elevated IgG levels.

**Table 2.** Association between quarantine, symptoms contact with COVID-19 patients, and prophylaxis and prevalence of positive tests (anti-SARS-CoV-2 IgG $\geq$ 15 AU/mL) among healthcare workers in a large university hospital, Milan Italy, April 27 to June 12, 2020.

| Variable                                   | Workers | Positive test |      |          |      |           |
|--------------------------------------------|---------|---------------|------|----------|------|-----------|
|                                            | N       | N             | %    | p-value* | OR** | 95% CI**  |
| Quarantine                                 |         |               |      |          |      |           |
| No                                         | 3,629   | 143           | 3.9  | <0.001   | 1.00 | Reference |
| Yes                                        | 426     | 166           | 39.0 |          | 15.6 | 12.0-20.1 |
| Any symptom                                |         |               |      |          |      |           |
| No                                         | 2,544   | 84            | 3.3  | <0.001   | 1.00 | Reference |
| Yes                                        | 1,511   | 225           | 14.9 |          | 5.12 | 3.95-6.64 |
| Number of symptoms                         |         |               |      |          |      |           |
| 1                                          | 608     | 56            | 9.2  | <0.001   | 2.97 | 2.09-4.22 |
| 2                                          | 389     | 45            | 11.6 |          | 3.83 | 2.62-5.60 |
| 3                                          | 226     | 38            | 16.8 |          | 5.91 | 3.93-8.93 |
| 4                                          | 1,118   | 24            | 20.3 |          | 7.48 | 4.54-12.3 |
| 5-10                                       | 170     | 62            | 36.5 |          | 16.8 | 11.5-24.6 |
| Contact with COVID-19 case                 |         |               |      |          |      |           |
| Unknown                                    | 2,372   | 134           | 5.6  | <0.001   | 1.00 | Reference |
| Suspected case                             | 335     | 34            | 10.1 |          | 1.89 | 1.27-2.80 |
| Confirmed case                             | 1,190   | 120           | 10.1 |          | 1.87 | 1.45-2.42 |
| Missing                                    | 158     | 21            | 13.3 |          |      |           |
| Among suspected or confirmed, contact with |         |               |      |          |      |           |
| Patients or colleagues within the hospital | 888     | 78            | 8.8  | <0.001   | 1.00 | Reference |
| Family member                              | 94      | 19            | 20.2 |          | 2.60 | 1.49-4.52 |
| Missing                                    | 543     | 57            | 10.5 |          |      |           |
| Prophylaxis or therapy                     |         |               |      |          |      |           |
| No                                         | 3,919   | 265           | 6.8  | <0.001   | 1.00 | Reference |
| Yes                                        | 136     | 44            | 32.3 |          | 6.59 | 4.51-9.65 |
| Nasopharyngeal swab                        |         |               |      |          |      |           |
| Negative*                                  | 2,376   | 175           | 7.4  | <0.001   | 1.00 | Reference |
| Positive                                   | 174     | 130           | 74.7 |          | 37.1 | 25.5-54.0 |
| Not performed                              | 1,506   | 4             | 0.3  |          | 0.03 | 0.01-0.09 |

Abbreviations: CI, confidence interval; OR, odds ratio.

\*From chi-squared test. For number of symptoms: from chi-squared test for trend. Missing data not included in analysis.

\*\*From univariate logistic regression models. Missing data not included in analyses.

There were 162 subjects with a positive NPS before IgG testing. Among these, IgG testing was performed between 17 and 94 days (Figure 1, left panel), with a peak between 49 and 63

228 days; the majority (159, 96.1%) were tested at least 21 days since the first positive swab. The  
 229 percentage of positive IgG tests (N=121) increased linearly (in the logit scale) over time  
 230 (Figure 1, right panel); it was 50-60% between 17 and 28 days, reaching 80% only after 60  
 231 days since the first positive NPS.

232 For every specific symptom, there was a positive association with elevated IgG levels (Table  
 233 3). Specifically, strong associations emerged with fever (19/374=31.8%) and with taste or  
 234 smell alterations (64/140=45.7%). In a multivariable model, these two symptoms were  
 235 confirmed as the strongest predictors of positive test (both ORs>4). Other symptoms  
 236 associated with positive SARS-CoV-2 serology were asthenia (OR=2.67), coryza (OR=1.90),  
 237 and cough (OR=1.65), while sore throat was negatively associated with test positivity  
 238 (OR=0.57). The AUC from the model containing all symptoms was 0.74 (95% CI: 0.74-  
 239 0.81).

240 **Table 3.** Association between selected symptoms and prevalence of positive tests (anti-  
 241 SARS-CoV-2 IgG $\geq$ 15 AU/mL) among healthcare workers in a large university hospital,  
 242 Milan, Italy, April 27 to June 12, 2020.

|                         | Workers | Positive test |      |          |      |           |
|-------------------------|---------|---------------|------|----------|------|-----------|
|                         | N       | N             | %    | p-value* | OR** | 95% CI**  |
| <b>Specific symptom</b> |         |               |      |          |      |           |
| Cough                   |         |               |      |          |      |           |
| No                      | 3,523   | 201           | 5.7  | <0.001   | 1.00 | Reference |
| Yes                     | 532     | 108           | 20.3 |          | 1.65 | 1.18-2.30 |
| Fever                   |         |               |      |          |      |           |
| No                      | 3,681   | 190           | 5.2  | <0.001   | 1.00 | Reference |
| Yes                     | 374     | 119           | 31.8 |          | 4.37 | 3.11-6.13 |
| Sore throat             |         |               |      |          |      |           |
| No                      | 3,677   | 261           | 7.1  | <0.001   | 1.00 | Reference |
| Yes                     | 378     | 48            | 12.7 |          | 0.57 | 0.38-0.86 |
| Coryza                  |         |               |      |          |      |           |
| No                      | 3,882   | 268           | 6.9  | <0.001   | 1.00 | Reference |
| Yes                     | 173     | 41            | 23.7 |          | 1.90 | 1.21-2.98 |
| Headache                |         |               |      |          |      |           |
| No                      | 3,920   | 277           | 7.1  | <0.001   | 1.00 | Reference |
| Yes                     | 135     | 32            | 23.7 |          | 0.96 | 0.58-1.61 |

|                             |       |     |      |        |      |           |
|-----------------------------|-------|-----|------|--------|------|-----------|
| Myalgias                    |       |     |      |        |      |           |
| No                          | 3,423 | 216 | 6.3  | <0.001 | 1.00 | Reference |
| Yes                         | 632   | 93  | 14.7 |        | 0.77 | 0.54-1.11 |
| Diarrhoea/nausea/vomit      |       |     |      |        |      |           |
| No                          | 3,633 | 254 | 7.0  | 0.006  | 1.00 | Reference |
| Yes                         | 422   | 55  | 13.0 |        | 0.85 | 0.58-1.24 |
| Asthenia                    |       |     |      |        |      |           |
| No                          | 3,619 | 199 | 5.5  | <0.001 | 1.00 | Reference |
| Yes                         | 436   | 110 | 25.2 |        | 2.67 | 1.87-3.80 |
| Ocular symptoms             |       |     |      |        |      |           |
| No                          | 3,847 | 281 | 7.3  | 0.001  | 1.00 | Reference |
| Yes                         | 208   | 28  | 13.5 |        | 0.78 | 0.46-1.32 |
| Dyspnoea                    |       |     |      |        |      |           |
| No                          | 3,927 | 275 | 7.0  | <0.001 | 1.00 | Reference |
| Yes                         | 128   | 34  | 26.6 |        | 1.38 | 0.82-2.32 |
| Taste and smell alterations |       |     |      |        |      |           |
| No                          | 3,915 | 245 | 6.3  | <0.001 | 1.00 | Reference |
| Yes                         | 140   | 64  | 45.7 |        | 4.62 | 2.99-7.15 |

243 Abbreviations: CI, confidence interval; OR, odds ratio.

244 \*From chi-squared test.

245 \*\*From a multivariable logistic model including all symptoms.

## 246 Discussion

247 In this study of HCWs of a large university hospital located in an area deeply affected by the  
 248 COVID-19 pandemic, in a period ranging from 2 to 4 months after the first reported case in  
 249 the hospital, a relevant fraction of the personnel (7.6%) showed anti-SARS-CoV-2 IgG  
 250 values compatible with a previous infection. The highest rates of seroprevalence were  
 251 detected among foreign-born workers, those belonging to extreme age groups (below 30  
 252 years and above 60 years) and healthcare assistants. SARS-CoV-2 seroprevalence of frontline  
 253 HCWs did not differ from those who did not report direct contact with COVID-19 patients.  
 254 Unsurprisingly, a large proportion (84/309, 27.2%) of workers with a positive serology did  
 255 not report any symptom in the previous four weeks. Yet, HCWs who presented symptoms  
 256 before the test, were quarantined, or took antiviral drugs as treatment or prophylaxis  
 257 displayed higher positivity rates compared to those who did not. Interestingly, smokers had a  
 258 significantly lower prevalence of positive serologies compared to non-smokers and former

1  
2  
3 259 smokers. Finally, among symptoms, fever and smell and taste alteration were those more  
4  
5 260 frequently associated with IgG positivity.  
6  
7

8 261 Our results are in accordance with the data presented by Sandri and colleagues, who  
9  
10 262 described a rate of positive SARS-CoV-2 serologies (in their study defined as IgG>12  
11  
12 263 AU/mL) ranging from 6.4% to 9% among the HCWs of three different hospitals in Milan  
13  
14 264 [21]. In the same study the authors described a higher seroprevalence, between 35% and  
15  
16 265 43%, in HCWs from Bergamo district, one of the areas in northern Italy most affected by  
17  
18 266 COVID-19. These results are corroborated by the data provided by the Bergamo Health  
19  
20 267 Authority, which reported a SARS-CoV-2 seroprevalence of 30.6% among HCWs from the  
21  
22 268 Bergamo metropolitan area (15). Noteworthy is thus the fact that seroprevalence among  
23  
24 269 HCWs mirrors the levels encountered in the general population, ranging from 7.1% and  
25  
26 270 56.9% in the Milan and Bergamo metropolitan area, respectively [22,23]. Wide variations in  
27  
28 271 seroprevalence among HCWs are reported worldwide, reflecting the distinct epidemiologic  
29  
30 272 scenarios occurring in each Country: SARS-CoV-2 seroprevalence of 1.6%, 3.8%, 5.0%,  
31  
32 273 9.3%, 19.1%, 24.4% and 33% are reported from studies conducted among HCWs in  
33  
34 274 Germany, China, Netherlands, Spain, Sweden, United Kingdom and the USA, respectively  
35  
36 275 [6,24–29].  
37  
38  
39  
40  
41  
42

43 276 Contrasting findings exist regarding the role of direct assistance to COVID-19 patients on the  
44  
45 277 risk of SARS-CoV-2 infections in HCWs. Comparing frontline to non-frontline workers, we  
46  
47 278 observed no difference in seroprevalence rates, in line with the findings of Mani and  
48  
49 279 colleagues [7]. At the same time, we observed a significantly higher seroprevalence among  
50  
51 280 healthcare assistants (40/320, 12.5%), with all the other occupations (physician, nurses and  
52  
53 281 midwives, technicians) below 8%. A similar seroprevalence (11.8%) was observed among  
54  
55 282 healthcare assistants during the SARS pandemic in 2004 [30]. These results may suggest that,  
56  
57 283 when nosocomial transmission occurs, it mainly involves those workers who have the closest  
58  
59  
60

1  
2  
3 284 contact with patients (e.g. healthcare assistants who take care of patients' primary needs) and  
4  
5 285 might therefore be at the highest risk. This condition may also reflect on the higher  
6  
7 286 seroprevalence detected among HCWs from abroad. Indeed, a large fraction of this group is  
8  
9  
10 287 composed by healthcare assistants (46%). When looking at healthcare assistants only,  
11  
12 288 seroprevalence in workers from abroad was twice as high (20%) than in workers of Italian  
13  
14  
15 289 ancestry (9.8%).

16  
17  
18 290 What appears from our results is that SARS-CoV-2 transmission largely occurred from close  
19  
20 291 contacts within the hospital in absolute terms (78 HCWs had contact with patients or  
21  
22 292 colleagues, against 19 at home). However, in relative terms the prevalence was higher outside  
23  
24 293 the hospital: in fact, HCWs who reported contacts with suspected or confirmed COVID-19  
25  
26 294 cases within the family had a prevalence of high IgG more than twice that of workers whose  
27  
28 295 contacts were patients or colleagues (20.2% vs 8.8%, respectively). Similar results of family  
29  
30 296 contacts as likely source of infection were reported by Sandri et al. with even higher  
31  
32  
33 297 percentages (31.2%) [21] and were further corroborated by the molecular analyses performed  
34  
35  
36 298 by Sikkema et al. [6].

37  
38  
39 299 Regarding the lower prevalence of positive serologies among smokers, a protective effect of  
40  
41 300 smoking on the risk of infection is unlikely. The lower seroprevalence we observed among  
42  
43 301 smokers might reflect the influence of smoking on major components of both innate and  
44  
45 302 adaptive immune cells [31]. Particularly, a decreased production of IgA, IgG and IgM has  
46  
47  
48 303 been observed in smokers if compared to non-smokers [32].

49  
50  
51 304 In our study, the positivity rate of anti-SARS-CoV-2 S1/S2 IgG in HCWs who had a positive  
52  
53 305 NPS (130/174, 74.7%) is sensibly lower than the values reported by the manufacturer, which  
54  
55 306 reports a sensitivity of 90.7% and 97.9% at 5-15 and >15 days after infection, respectively  
56  
57  
58 307 [19]. Of note, 53/162 (32.7%) of the tested workers performed serology 2 or more months  
59  
60



1  
2  
3 308 after first NPS positivity (Figure 1, left panel), and it is currently unknown for how long  
4  
5 309 antibodies persist following SARS-CoV-2 infection. While in some studies antibody titres did  
6  
7  
8 310 not decline within 6 months after diagnosis [13–15], others reported a rapid waning over 3–4  
9  
10 311 months [16,17]. In our cohort the percentage of positive IgG tests increased monotonically  
11  
12 312 over time (Figure 1, right panel), supporting the persistence of anti-SARS-CoV-2 S1/S2 IgG  
13  
14 313 up to 3 months from NPS positivity. On the other hand, we found that 7.4% of workers with  
15  
16 314 negative NPS (175/2,375) had  $\text{IgG} \geq 15$  AU/mL. Unfortunately, we are unable to ascertain  
17  
18 315 what proportion is due to lack of NPS sensitivity and what arises from imperfect specificity  
19  
20 316 of IgG test. In fact, our study was not designed to assess the accuracy of the serologic test.  
21  
22  
23 317 Further reports of real-life data are therefore needed.

24  
25  
26 318 Finally, positive serology was associated with a recent history of typical symptoms of SARS-  
27  
28 319 CoV-2 infection, especially taste and smell alterations and fever. These findings corroborate  
29  
30 320 previous observations made by our group who identified taste and smell alterations and fever  
31  
32 321 as the symptoms most frequently reported in HCWs with SARS-Cov-2 positivity on NPS  
33  
34 322 [10]. Other authors confirmed the same observations, suggesting that anosmia is the symptom  
35  
36 323 which better characterizes COVID-19 [21,26,27]. Notably, a large fraction of HCWs with  
37  
38 324 positive serology (84/309, 27.2%) did not report any symptom in the four weeks before the  
39  
40  
41 325 test. This finding is also well-described in COVID-19 epidemiology, where the rate of  
42  
43 326 asymptomatic or pauci-symptomatic infected persons ranges from 1.6% to 56.5% depending  
44  
45 327 on subject characteristics and on the analysed country [33]. Unfortunately, in hospital settings  
46  
47 328 the absence of symptoms makes it difficult to identify infected HCWs and hampers many  
48  
49  
50 329 strategies to control the infection.

51  
52  
53  
54 330 The first limitation of our work has been noted above: this study was performed for health  
55  
56 331 surveillance purposes and thus not designed to evaluate serologic test performance  
57  
58  
59 332 (sensitivity and specificity). Secondly, some degree of recall bias, i.e., under-reporting of

1  
2  
3 333 mild symptoms which occurred many weeks before serologic test, is a possibility. In this  
4  
5 334 case, we may have overestimated the proportion of asymptomatic workers with elevated IgG.  
6  
7  
8 335 Yet, considering that the study started at the end of April 2020, and that the COVID-19  
9  
10 336 pandemic in Lombardy begun at the end of February, we probably missed only a small  
11  
12 337 percentage of subjects with clinical manifestations. Thirdly, the serologic assessment was not  
13  
14 338 mandatory and was therefore not performed on all HCWs. Nevertheless, considering that the  
15  
16 339 hospital employees are 4,572, our study has involved a large fraction of them (4,055/4,572,  
17  
18 340 88.7%) and thus provides a fair description of SARS-CoV-2 exposure in HCWs of our  
19  
20 341 hospital. Finally, we could not evaluate the serologic status of all HCWs in a single day. As  
21  
22 342 the epidemic was still ongoing, even though on a much smaller scale (the zenith of the  
23  
24 343 infection was in March), we may have missed a few new infections.

25  
26  
27  
28  
29 344 What is suggested by our study, and by those similarly performed in the same area in the  
30  
31 345 context of the ongoing pandemic [21], is that the observed seroprevalence rate reflects the  
32  
33 346 spread of infection in the community served by the hospital. Assuming that PPE is provided  
34  
35 347 and correctly employed by all HCWs, hospitals do not seem to act as an epicentre of the  
36  
37 348 infection. In our study, healthcare assistants showed the highest seroprevalence rate. We do  
38  
39 349 believe that education and training of all HCWs should be strongly supported. Periodic  
40  
41 350 training of correct use of PPE and infection control procedures should be addressed not only  
42  
43 351 to physicians and nurses but also to other healthcare professionals.

44  
45  
46  
47  
48 352 The fact that more than one quarter of SARS-CoV-2 infections occurred unnoticed supports  
49  
50 353 the implementation of systematic testing strategies among HCWs without an ascertained  
51  
52 354 history of infection. Unfortunately, the best testing strategy as well as the timing and setting  
53  
54 355 in which these tests have the highest performance is still uncertain. Future studies should  
55  
56 356 address these gaps of knowledge. As of now, we deem it is important to monitor periodically  
57  
58 357 SARS-CoV-2 serology in HCWs to correlates the seroprevalence rates with those of general

1  
2  
3 358 population and detect any discrepancy. This will allow to implement timely and effective  
4  
5 359 infection control measures, thus preventing hospitals to become drivers of future COVID-19  
6  
7  
8 360 outbreaks.  
9  
10  
11  
12  
13  
14  
15  
16  
17  
18  
19  
20  
21  
22  
23  
24  
25  
26  
27  
28  
29  
30  
31  
32  
33  
34  
35  
36  
37  
38  
39  
40  
41  
42  
43  
44  
45  
46  
47  
48  
49  
50  
51  
52  
53  
54  
55  
56  
57  
58  
59  
60

For peer review only

1  
2  
3 362 **Contributorship statement:** AL, DM, DC, AB and AG conceived the study. LC, PB, APC,  
4  
5 363 BT, MC, GL, ACP, LR, AM and FC collected the data and performed the serologic survey.  
6  
7 364 DC performed the statistical analyses. AL, DM, DC wrote the first draft of the manuscript.  
8  
9  
10 365 All authors revised the final version of the manuscript.  
11

12  
13 366 **Data sharing statement:** raw data will be provided on reasonable request contacting the  
14  
15 367 corresponding author.  
16

17  
18 368 **Acknowledgments:** This work is dedicated to the memory of GL, which sadly passed away  
19  
20 369 during the revision of this paper. We thank the personnel of SPIO (Servizio Prevenzione e  
21  
22  
23 370 Igiene Ospedaliera), S. Adamoli, F. De Palo, M. Gatti, L. Guerrieri, P. Marazzi, B. Marinelli,  
24  
25 371 M. Polonioli, S. Pratò, E. Radice, and D. Serra for their help in data collection.  
26  
27  
28  
29  
30  
31  
32  
33  
34  
35  
36  
37  
38  
39  
40  
41  
42  
43  
44  
45  
46  
47  
48  
49  
50  
51  
52  
53  
54  
55  
56  
57  
58  
59  
60

373 **References**

- 374 1 COVID-19 Map - Johns Hopkins Coronavirus Resource Center.  
375 <https://coronavirus.jhu.edu/map.html>
- 376 2 Chou R, Dana T, Buckley DI, *et al.* Epidemiology of and Risk Factors for Coronavirus  
377 Infection in Health Care Workers: A Living Rapid Review. *Ann Intern Med*  
378 2020;**173**:120–36. doi:10.7326/M20-1632
- 379 3 Lai X, Wang M, Qin C, *et al.* Coronavirus Disease 2019 (COVID-2019) Infection  
380 Among Health Care Workers and Implications for Prevention Measures in a Tertiary  
381 Hospital in Wuhan, China. *JAMA Netw open* 2020;**3**:e209666.  
382 doi:10.1001/jamanetworkopen.2020.9666
- 383 4 Nguyen LH, Drew DA, Joshi AD, *et al.* Risk of COVID-19 among frontline healthcare  
384 workers and the general community: a prospective cohort study. *medRxiv Prepr Serv*  
385 *Heal Sci* Published Online First: 2020. doi:10.1101/2020.04.29.20084111
- 386 5 Gómez-Ochoa SA, Franco OH, Rojas LZ, *et al.* COVID-19 in Healthcare Workers: A  
387 Living Systematic Review and Meta-analysis of Prevalence, Risk Factors, Clinical  
388 Characteristics, and Outcomes. *Am J Epidemiol* Published Online First: 2020.  
389 doi:10.1215/9781478003335-098
- 390 6 Sikkema RS, Pas S, Nieuwenhuijse DF, *et al.* COVID-19 in healthcare workers in  
391 three hospitals in the South of the Netherlands, March 2020. *medRxiv*  
392 2020;**96**:2020.04.26.20079418. doi:10.1101/2020.04.26.20079418
- 393 7 Nandita S. Mani, Budak JZ, Lan KF, *et al.* Prevalence of COVID-19 Infection and  
394 Outcomes Among Symptomatic Healthcare Workers in Seattle, Washington. *Clin*  
395 *Infect Dis* Published Online First: 2020. doi:10.1093/ofid/ofy003/4791932

- 1  
2  
3 396 8 Bergh MFQK den, Buiting AGM, Pas SD, *et al.* SARS-CoV-2 infection in 86  
4  
5 397 healthcare workers in two Dutch hospitals in March. *medRxiv* 2020;:1–16.  
6  
7  
8 398 9 Mohammadi A, Esmaeilzadeh E, Li Y, *et al.* SARS-CoV-2 detection in different  
9  
10 399 respiratory sites: A systematic review and meta-analysis. *EBioMedicine* 2020;:1–20.  
11  
12 doi:10.1016/j.ebiom.2020.102903  
13 400  
14  
15  
16 401 10 Lombardi A, Consonni D, Carugno M, *et al.* Characteristics of 1,573 Healthcare  
17  
18 402 Workers Who Underwent Nasopharyngeal Swab for SARS-CoV-2 in Milano,  
19  
20 403 Lombardy, Italy. *Clin Microbiol Infect* Published Online First: 2020.  
21  
22 doi:10.2139/ssrn.3588560  
23 404  
24  
25  
26 405 11 Tartari E, Saris K, Kenters N, *et al.* Not sick enough to worry? ‘Influenza-like’  
27  
28 406 symptoms and work-related behavior among healthcare workers and other  
29  
30 407 professionals: Results of a global survey. *PLoS One* 2020;15:1–14.  
31  
32 doi:10.1371/journal.pone.0232168  
33 408  
34  
35  
36 409 12 Deeks JJ, Dinnes J, Takwoingi Y, *et al.* Antibody tests for identification of current and  
37  
38 410 past infection with SARS-CoV-2. *Cochrane database Syst Rev* 2020;6:CD013652.  
39  
40 411 doi:10.1002/14651858.CD013652  
41  
42  
43  
44 412 13 Gudbjartsson DF, Norddahl GL, Melsted P, *et al.* Humoral Immune Response to  
45  
46 413 SARS-CoV-2 in Iceland. *N Engl J Med* 2020;383:1724–34.  
47  
48 414 doi:10.1056/nejmoa2026116  
49  
50  
51 415 14 Wajnberg A, Amanat F, Firpo A, *et al.* Robust neutralizing antibodies to SARS-CoV-2  
52  
53 416 infection persist for months. *Science (80- )* 2020;370:1227–30.  
54  
55 417 doi:10.1126/science.abd7728  
56  
57  
58 418 15 L’Huillier AG, Meyer B, Andrey DO, *et al.* Antibody persistence in the first six  
59  
60

- 1  
2  
3 419 months following SARS-CoV-2 infection among hospital workers: a prospective  
4  
5 420 longitudinal study. *Clin Microbiol Infect* Published Online First: January 2021.  
6  
7 421 doi:10.1016/j.cmi.2021.01.005  
8  
9  
10 422 16 Ward H, Cooke G, Atchison C, *et al.* Declining prevalence of antibody positivity to  
11  
12 SARS-CoV-2: a community study of 365,000 adults. *medRxiv* Published Online First:  
13 423  
14 2020. doi:10.1101/2020.10.26.20219725  
15 424  
16  
17  
18 425 17 Seow J, Graham C, Merrick B, *et al.* Longitudinal observation and decline of  
19  
20 neutralizing antibody responses in the three months following SARS-CoV-2 infection  
21 426  
22 in humans. *Nat Microbiol* 2020;**5**:1598–607. doi:10.1038/s41564-020-00813-8  
23 427  
24  
25  
26 428 18 Bandera A, Aliberti S, Gualtierotti R, *et al.* COVID-19 network: the response of an  
27  
28 Italian reference Institute to research challenges about a new pandemia. *Clin Microbiol*  
29 429  
30 *Infect* Published Online First: 2020. doi:10.1016/j.cmi.2020.06.028  
31 430  
32  
33  
34 431 19 Diasorin. LIAISON ® SARS-CoV-2 S1/S2 IgG Factsheet.  
35  
36  
37 432 20 Sempos CT, Tian L. Adjusting Coronavirus Prevalence Estimates for Laboratory Test  
38  
39 433 Kit Error. *Am J Epidemiol* 2020;**21078**:1–28.  
40  
41  
42 434 21 Sandri MT, Azzolini E, Torri V, *et al.* IgG serology in health care and administrative  
43  
44 435 staff populations from 7 hospitals representative of different exposures to SARS-CoV-  
45  
46 436 2 in Lombardy, Italy. *medRxiv* 2020.  
47  
48  
49 437 22 Coronavirus: i dati dei test sierologici effettuati nella Bergamasca dal 23 aprile al 3  
50  
51 438 giugno. 2020.  
52  
53  
54 439 23 Valenti L, Bergna A, Pelusi S, *et al.* SARS-CoV-2 seroprevalence trends in healthy  
55  
56 440 blood donors during the COVID-19 Milan outbreak. *medRxiv*  
57  
58 2020;:2020.05.11.20098442. doi:10.1101/2020.05.11.20098442  
59 441  
60

- 1  
2  
3 442 24 Korth J, Wilde B, Dolff S, *et al.* SARS-CoV-2-specific antibody detection in  
4  
5 443 healthcare workers in Germany with direct contact to COVID-19 patients. *J Clin Virol*  
6  
7 444 2020;**128**. doi:10.1016/j.jcv.2020.104437  
8  
9  
10 445 25 Xu X, Sun J, Nie S, *et al.* Seroprevalence of immunoglobulin M and G antibodies  
11  
12 446 against SARS-CoV-2 in China. *Nat Med* 2020;**26**. doi:10.1038/s41591-020-0949-6  
13  
14  
15 447 26 Garcia-Basteiro AL, Moncunill G, Tortajada M, *et al.* Seroprevalence of antibodies  
16  
17 448 against SARS-CoV-2 among health care workers in a large Spanish reference hospital.  
18  
19 449 2020;:1–36.  
20  
21  
22  
23 450 27 Rudberg A, Havervall S, Månberg A, *et al.* SARS-CoV-2 exposure , symptoms and  
24  
25 451 seroprevalence in health care workers. 2020.  
26  
27  
28 452 28 Shields AM, Faustini SE, Perez-Toledo M, *et al.* SARS-CoV-2 seroconversion in  
29  
30 453 health care workers. *medRxiv* Published Online First: 2020.  
31  
32 454 doi:10.1017/CBO9781107415324.004  
33  
34  
35  
36 455 29 Mansour M, Leven E, Muellers K, *et al.* Prevalence of SARS-CoV-2 Antibodies  
37  
38 456 Among Healthcare Workers at a Tertiary Academic Hospital in New York City. *J Gen*  
39  
40 457 *Intern Med* 2020;:2–3. doi:10.1007/s11606-020-05926-8  
41  
42  
43  
44 458 30 Ip M, Chan PKS, Lee N, *et al.* Seroprevalence of Antibody to Severe Acute  
45  
46 459 Respiratory Syndrome (SARS)-Associated Coronavirus among Health Care Workers  
47  
48 460 in SARS and Non-SARS Medical Wards. *Clin Infect Dis* 2004;**38**:e116–8.  
49  
50 461 doi:10.1086/421019  
51  
52  
53  
54 462 31 Qiu F, Liang CL, Liu H, *et al.* Impacts of cigarette smoking on immune  
55  
56 463 responsiveness: Up and down or upside down? *Oncotarget* 2017;**8**:268–84.  
57  
58 464 doi:10.18632/oncotarget.13613  
59  
60



- 1  
2  
3 465 32 Giuca MR, Pasini M, Tecco S, *et al.* Levels of salivary immunoglobulins and  
4  
5 466 periodontal evaluation in smoking patients. *BMC Immunol* 2014;**15**:2–6.  
6  
7 467 doi:10.1186/1471-2172-15-5  
8  
9  
10 468 33 Gao Z, Xu Y, Sun C, *et al.* A systematic review of asymptomatic infections with  
11  
12 COVID-19. *J Microbiol Immunol Infect* 2020;:1–5. doi:10.1016/j.jmii.2020.05.001  
13 469  
14  
15  
16 470

For peer review only

1  
2  
3 472 **Figures**  
4  
5

6 473 **Figure 1**  
7  
8

9 474 Number of IgG tests (left panel) and percentage of positive IgG tests (right panel) in 162  
10  
11 475 subjects with a positive nasopharyngeal swab prior to serologic testing, according to days  
12  
13 476 elapsed since day of first positive nasopharyngeal swab.  
14  
15

16  
17 477 Left panel shows histogram and kernel density smoothing line. In right panel circles indicate  
18 478 subjects with negative (lower circles, N=41) or positive (upper circles, N=121) anti-SARS-  
19 479 CoV-2 IgG, solid and dashed lines are the predicted percentages calculated with a logistic  
20 480 regression model, and dashed lines are 95% bands around the predicted.  
21  
22  
23  
24  
25  
26  
27  
28  
29  
30  
31  
32  
33  
34  
35  
36  
37  
38  
39  
40  
41  
42  
43  
44  
45  
46  
47  
48  
49  
50  
51  
52  
53  
54  
55  
56  
57  
58  
59  
60

1  
2  
3  
4  
5  
6  
7  
8  
9  
10  
11  
12  
13  
14  
15  
16  
17  
18  
19  
20  
21  
22  
23  
24  
25  
26  
27  
28  
29  
30  
31  
32  
33  
34  
35  
36  
37  
38  
39  
40  
41  
42  
43  
44  
45  
46  
47  
48  
49  
50  
51  
52  
53  
54  
55  
56  
57  
58  
59  
60

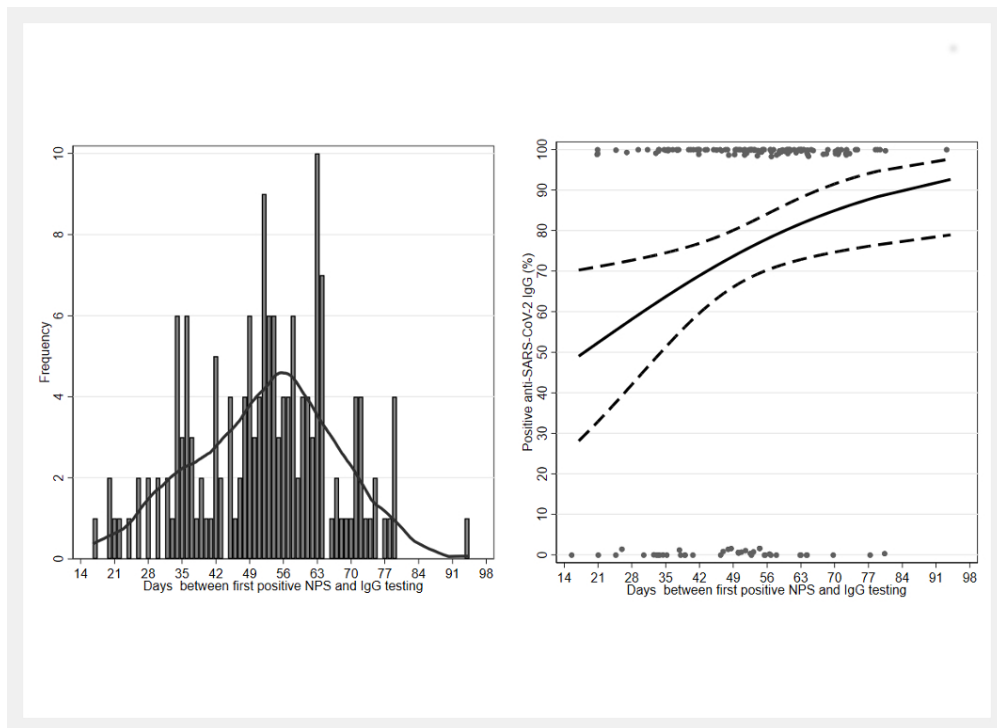

Number of IgG tests (left panel) and percentage of positive IgG tests (right panel) in 162 subjects with a positive nasopharyngeal swab prior to serologic testing, according to days elapsed since day of first positive nasopharyngeal swab.

90x65mm (300 x 300 DPI)

✓STROBE Statement—Checklist of items that should be included in reports of *cohort studies*

|                              | Item No | Recommendation                                                                                                                                                                                                                                                                                                                                                                         |
|------------------------------|---------|----------------------------------------------------------------------------------------------------------------------------------------------------------------------------------------------------------------------------------------------------------------------------------------------------------------------------------------------------------------------------------------|
| <b>Title and abstract</b>    | 1       | (a) Indicate the study's design with a commonly used term in the title or the abstract <b>p. 2</b><br>(b) Provide in the abstract an informative and balanced summary of what was done and what was found <b>p. 2-3</b>                                                                                                                                                                |
| <b>Introduction</b>          |         |                                                                                                                                                                                                                                                                                                                                                                                        |
| Background/rationale         | 2       | Explain the scientific background and rationale for the investigation being reported <b>p. 4-5</b>                                                                                                                                                                                                                                                                                     |
| Objectives                   | 3       | State specific objectives, including any prespecified hypotheses <b>p. 5</b>                                                                                                                                                                                                                                                                                                           |
| <b>Methods</b>               |         |                                                                                                                                                                                                                                                                                                                                                                                        |
| Study design                 | 4✓      | Present key elements of study design early in the paper <b>p. 5-6</b>                                                                                                                                                                                                                                                                                                                  |
| Setting                      | 5✓      | Describe the setting, locations, and relevant dates, including periods of recruitment, exposure, follow-up, and data collection <b>p. 5-6</b>                                                                                                                                                                                                                                          |
| Participants                 | 6✓      | (a) Give the eligibility criteria, and the sources and methods of selection of participants. Describe methods of follow-up <b>p. 5-6</b><br>(b) For matched studies, give matching criteria and number of exposed and unexposed <b>n/a</b>                                                                                                                                             |
| Variables                    | 7✓      | Clearly define all outcomes, exposures, predictors, potential confounders, and effect modifiers. Give diagnostic criteria, if applicable <b>p. 6-8</b>                                                                                                                                                                                                                                 |
| Data sources/<br>measurement | 8*✓     | For each variable of interest, give sources of data and details of methods of assessment (measurement). <b>p. 6-8</b> Describe comparability of assessment methods if there is more than one group <b>n/a</b>                                                                                                                                                                          |
| Bias                         | 9✓      | Describe any efforts to address potential sources of bias <b>p. 16</b>                                                                                                                                                                                                                                                                                                                 |
| Study size                   | 10✓     | Explain how the study size was arrived at <b>p. 5-6</b>                                                                                                                                                                                                                                                                                                                                |
| Quantitative variables       | 11      | Explain how quantitative variables were handled in the analyses. If applicable, describe which groupings were chosen and why <b>p. 7-8</b>                                                                                                                                                                                                                                             |
| Statistical methods          | 12✓     | (a) Describe all statistical methods, including those used to control for confounding <b>p. 7-8</b><br>(b) Describe any methods used to examine subgroups and interactions <b>p. 7-8</b><br>(c) Explain how missing data were addressed <b>n/a</b><br>(d) If applicable, explain how loss to follow-up was addressed <b>n/a</b><br>(e) Describe any sensitivity analyses <b>p. 7-8</b> |
| <b>Results</b>               |         |                                                                                                                                                                                                                                                                                                                                                                                        |
| Participants                 | 13*✓    | (a) Report numbers of individuals at each stage of study—eg numbers potentially eligible, examined for eligibility, confirmed eligible, included in the study, completing follow-up, and analysed <b>p. 8</b><br>(b) Give reasons for non-participation at each stage <b>n/a</b><br>(c) Consider use of a flow diagram <b>n/a</b>                                                      |
| Descriptive data             | 14*✓    | (a) Give characteristics of study participants (eg demographic, clinical, social) and information on exposures and potential confounders <b>p. 8-13</b><br>(b) Indicate number of participants with missing data for each variable of interest <b>n/a</b><br>(c) Summarise follow-up time (eg, average and total amount) <b>p. 8-13</b>                                                |
| Outcome data                 | 15*✓    | Report numbers of outcome events or summary measures over time <b>p. 8-13</b>                                                                                                                                                                                                                                                                                                          |
| Main results                 | 16✓     | (a) Give unadjusted estimates and, if applicable, confounder-adjusted estimates and their precision (eg, 95% confidence interval). Make clear which confounders were                                                                                                                                                                                                                   |

|                          |     |                                                                                                                                                                                            |
|--------------------------|-----|--------------------------------------------------------------------------------------------------------------------------------------------------------------------------------------------|
|                          |     | adjusted for and why they were included <b>p. 8-13</b>                                                                                                                                     |
|                          |     | (b) Report category boundaries when continuous variables were categorized <b>p. 8-13</b>                                                                                                   |
|                          |     | (c) If relevant, consider translating estimates of relative risk into absolute risk for a meaningful time period <b>p. 8-13</b>                                                            |
| Other analyses           | 17✓ | Report other analyses done—eg analyses of subgroups and interactions, and sensitivity analyses <b>p. 8-13</b>                                                                              |
| <b>Discussion</b>        |     |                                                                                                                                                                                            |
| Key results              | 18✓ | Summarise key results with reference to study objectives <b>p. 13</b>                                                                                                                      |
| Limitations              | 19✓ | Discuss limitations of the study, taking into account sources of potential bias or imprecision. Discuss both direction and magnitude of any potential bias <b>p. 16-17</b>                 |
| Interpretation           | 20✓ | Give a cautious overall interpretation of results considering objectives, limitations, multiplicity of analyses, results from similar studies, and other relevant evidence <b>p. 14-16</b> |
| Generalisability         | 21✓ | Discuss the generalisability (external validity) of the study results <b>p. 17</b>                                                                                                         |
| <b>Other information</b> |     |                                                                                                                                                                                            |
| Funding                  | 22✓ | Give the source of funding and the role of the funders for the present study and, if applicable, for the original study on which the present article is based <b>p. 3</b>                  |

\*Give information separately for exposed and unexposed groups.

**Note:** An Explanation and Elaboration article discusses each checklist item and gives methodological background and published examples of transparent reporting. The STROBE checklist is best used in conjunction with this article (freely available on the Web sites of PLoS Medicine at <http://www.plosmedicine.org/>, Annals of Internal Medicine at <http://www.annals.org/>, and Epidemiology at <http://www.epidem.com/>). Information on the STROBE Initiative is available at <http://www.strobe-statement.org>.
